# Supplementary material for: Clinical Prediction Models for Valvular Heart Disease
Source: PubMed Central journal article supplement — J Am Heart Assoc. 2019 Oct 4;8(20):e011972. doi: 10.1161/JAHA.119.011972 (PMC6818049; doi:10.1161/jaha.119.011972), 2019-10-04
Supplement: JAH3-8-e011972-s001.pdf [file JAH3-8-e011972-s001.pdf]

# **SUPPLEMENTAL MATERIAL**

**Table S1. Search strategy used to identify all CVD/Cerebrovascular and VHD-specific CPMs.**

| <b>All CPM Search Terms</b>                                                                                                                                                                                                                                                                                                                                |
|------------------------------------------------------------------------------------------------------------------------------------------------------------------------------------------------------------------------------------------------------------------------------------------------------------------------------------------------------------|
| ((predict\$ adj1 model\$) or (predict\$ adj1 instrument\$) or (predict\$ adj1 score\$) or (predict\$ adj1 index)).mp.                                                                                                                                                                                                                                      |
| ((prognos\$ adj1 model\$) or (prognos\$ adj1 instrument\$) or (prognos\$ adj1 score\$) or (prognos\$ adj1 index)).mp.                                                                                                                                                                                                                                      |
| ((risk adj1 model\$) or (risk adj1 instrument\$) or (risk adj1 score\$) or (risk adj1 index) or (risk assessment model or risk assessment instrument or risk assessment score)).mp.                                                                                                                                                                        |
| atrial fib\$.mp. or exp Atrial Fibrillation/ or exp coronary artery disease/ or exp coronary disease/ or exp myocardial infarction/ or Myocardial infarct\$.mp. or exp Heart Failure, Congestive/ or exp myocardial ischemia/ or exp cardiovascular diseases/ or exp Cerebrovascular Accident/ or *heart failure/ or *stroke/ or *acute coronary syndrome/ |
| limit 6 to yr="1990 -Current"<br>**Where current = May 15, 2012 publications                                                                                                                                                                                                                                                                               |
| (201205\$ or 201206\$ or 201207\$ or 201208\$ or 201209\$ or 201210\$ or 201211\$ or 201212\$ or 2013\$ or 2014\$ or 201501\$ or 201502\$ or 201503\$).ed.                                                                                                                                                                                                 |
| <b>VHD CPM Search Terms</b>                                                                                                                                                                                                                                                                                                                                |
| ((predict\$ adj1 model\$) or (predict\$ adj1 instrument\$) or (predict\$ adj1 score\$) or (predict\$ adj1 index)).mp.                                                                                                                                                                                                                                      |
| ((prognos\$ adj1 model\$) or (prognos\$ adj1 instrument\$) or (prognos\$ adj1 score\$) or (prognos\$ adj1 index)).mp.                                                                                                                                                                                                                                      |
| ((risk adj1 model\$) or (risk adj1 instrument\$) or (risk adj1 score\$) or (risk adj1 index) or (risk assessment model or risk assessment instrument or risk assessment score)).mp.                                                                                                                                                                        |
| heart valve prosthesis\$.mp. or exp cardiovascular surg\$.mp. or exp valve replacement/ or exp valve intervention/ or exp aortic valve/ or exp mitral valve/ or exp tricuspid valve/ or exp pulmonic valve/                                                                                                                                                |
| (201504\$ or 201505\$ or 201506\$ or 201507\$ or 201508\$ or 201509\$ or 201510\$ or 201511\$ or 201512\$ or 2016\$ or 2017\$).ed.                                                                                                                                                                                                                         |

**Table S2. De Novo Model Unabridged Overview.**

| Author, Model Name                                      | Year | Valve           | Standardized Type of Intervention | Specific Intervention             | Outcome                    | Centers       | Sample Size | Number of Events | EP V | Age  | Continent     | Model Method               | C-statistic | Calibration Measure            | Externally Validated? |
|---------------------------------------------------------|------|-----------------|-----------------------------------|-----------------------------------|----------------------------|---------------|-------------|------------------|------|------|---------------|----------------------------|-------------|--------------------------------|-----------------------|
| <i>Isolated Valve Intervention (+/- CABG)</i>           |      |                 |                                   |                                   |                            |               |             |                  |      |      |               |                            |             |                                |                       |
| Edwards <sup>1</sup> , STS (original) -- Isolated Valve | 2001 | Aortic/Mitral   | Surgery                           | AVR or MVR                        | 30 Day Operative Mortality | Multi-center  | 49073       | 2291             | 121  | 63.7 | North America | Logistic regression        | 0.766       | HL statistic, Calibration plot | Yes                   |
| Nowicki <sup>2</sup> , NNE Aortic and Mitral Models     | 2004 | Aortic          | Surgery                           | AVR +/- CABG                      | In-Hospital Mortality      | Multi-center  | 5793        | 360              | 40   | 69.5 | North America | Logistic regression, Score | 0.75        | HL statistic                   | Yes                   |
|                                                         |      | Mitral          | Surgery                           | MVR or MVRrepair                  | In-Hospital Mortality      | Multi-center  | 3150        | 296              | 30   | 66.7 | North America | Logistic regression, Score | 0.79        | HL statistic                   | Yes                   |
| Kuduvalli <sup>3</sup> , NWQIP                          | 2007 | Aortic          | Surgery                           | AVR +/- CABG                      | In-Hospital Mortality      | Multi-center  | 4550        | 207              | 21   | 69   | Europe        | Logistic regression, Score | 0.78        | HL statistic                   | Yes                   |
| Cruz-Gonzalez <sup>4</sup> , PMV Score                  | 2009 | Mitral          | Percutaneous                      | Percutaneous Mitral Valvuloplasty | Procedural Success         | Single center | 800         | 544              | 91   | 54.9 | North America | Logistic regression, Score | NR          | HL statistic                   | Yes                   |
| Monin <sup>5</sup>                                      | 2009 | Aortic Stenosis | Natural History                   | None                              | Composite (Non-MACE)       | Single center | 107         | 62               | 9    | 72   | Europe        | Logistic regression, Score | 0.90        | HL statistic                   | Yes                   |
| O'Brien <sup>6</sup> , STS (new) -- Composite AEs       | 2009 | Aortic/Mitral   | Surgery                           | AVR or MVR or MVRrepair           | Composite (Non-MACE)       | Multi-center  | 109759      | 20074            | 574  | NR   | North America | Logistic regression        | 0.721       | None                           | Yes                   |
| O'Brien <sup>6</sup> , STS (new) -- DSWI                | 2009 | Aortic/Mitral   | Surgery                           | AVR or MVR or MVRrepair           | DSWI                       | Multi-center  | 109759      | 307              | 26   | NR   | North America | Logistic regression        | 0.704       | None                           | Yes                   |

| Author, Model Name                                       | Year | Valve         | Standardized Type of Intervention | Specific Intervention                   | Outcome               | Centers       | Sample Size | Number of Events | EPV  | Age   | Continent     | Model Method               | C-statistic | Calibration Measure            | Externally Validated? |
|----------------------------------------------------------|------|---------------|-----------------------------------|-----------------------------------------|-----------------------|---------------|-------------|------------------|------|-------|---------------|----------------------------|-------------|--------------------------------|-----------------------|
| O'Brien <sup>6</sup> , STS (new) -- Mortality            | 2009 | Aortic/Mitral | Surgery                           | AVR or MVR or MVRRepair                 | 30 Day Mortality      | Multi-center  | 109759      | 3706             | 100  | NR    | North America | Logistic regression        | 0.805       | None                           | Yes                   |
| O'Brien <sup>6</sup> , STS (new) – Prolonged LOS         | 2009 | Aortic/Mitral | Surgery                           | AVR or MVR or MVRRepair                 | Prolonged LOS         | Multi-center  | 109759      | 9718             | 270  | NR    | North America | Logistic regression        | 0.77        | None                           | Yes                   |
| O'Brien <sup>6</sup> , STS (new) – Prolonged Ventilation | 2009 | Aortic/Mitral | Surgery                           | AVR or MVR or MVRRepair                 | Prolonged Ventilation | Multi-center  | 109759      | 12892            | 331  | NR    | North America | Logistic regression        | 0.77        | None                           | Yes                   |
| O'Brien <sup>6</sup> , STS (new) – Renal Failure         | 2009 | Aortic/Mitral | Surgery                           | AVR or MVR or MVRRepair                 | Renal Failure         | Multi-center  | 107060      | 4673             | 173  | NR    | North America | Logistic regression        | 0.782       | None                           | Yes                   |
| O'Brien <sup>6</sup> , STS (new) -- Reoperation          | 2009 | Aortic/Mitral | Surgery                           | AVR or MVR or MVRRepair                 | Reoperation           | Multi-center  | 109759      | 9164             | 305  | NR    | North America | Logistic regression        | 0.643       | None                           | Yes                   |
| O'Brien <sup>6</sup> , STS (new) – Short LOS             | 2009 | Aortic/Mitral | Surgery                           | AVR or MVR or MVRRepair                 | Prolonged LOS         | Multi-center  | 109759      | 41214            | 1178 | NR    | North America | Logistic regression        | 0.738       | None                           | No                    |
| O'Brien <sup>6</sup> , STS (new) -- Stroke               | 2009 | Aortic/Mitral | Surgery                           | AVR or MVR or MVRRepair                 | Stroke                | Multi-center  | 109759      | 1751             | 92   | NR    | North America | Logistic regression        | 0.694       | None                           | Yes                   |
| Guaragna <sup>7</sup> , GuaragnaSCORE                    | 2010 | Aortic/Mitral | Surgery                           | Isolated Cardiac Valve Surgery +/- CABG | In-Hospital Mortality | Single center | 699         | 128              | 16   | 55.5  | South America | Logistic regression, Score | 0.82        | HL statistic, Calibration plot | Yes                   |
| Guo <sup>8</sup>                                         | 2010 | Aortic        | Surgery                           | AVR                                     | In-Hospital Mortality | Single center | 1087        | 45               | 6    | 60.24 | Asia          | Logistic regression        | NR          | HL statistic                   | No                    |
|                                                          |      | Mitral        | Surgery                           | MVR                                     | In-Hospital Mortality | Single center | 1752        | 79               | 16   | 50.89 | Asia          | Logistic regression        | NR          | HL statistic                   | No                    |
| Elmariah <sup>9</sup> , CRRAC the AV Score               | 2011 | Aortic        | Percutaneous                      | Balloon Aortic Valvuloplasty            | 30 Day Mortality      | Single center | 281         | 36               | 9    | 83    | North America | Cox regression, Score      | 0.754       | HL statistic                   | No                    |

| Author, Model Name                                                             | Year | Valve           | Standardized Type of Intervention | Specific Intervention              | Outcome               | Centers       | Sample Size | Number of Events | EPV | Age  | Continent             | Model Method               | C-statistic | Calibration Measure                         | Externally Validated? |
|--------------------------------------------------------------------------------|------|-----------------|-----------------------------------|------------------------------------|-----------------------|---------------|-------------|------------------|-----|------|-----------------------|----------------------------|-------------|---------------------------------------------|-----------------------|
| Bouleti <sup>10</sup>                                                          | 2012 | Mitral          | Percutaneous                      | Percutaneous Mitral Commissurotomy | Composite (MACE)      | Single center | 609         | 309              | 77  | 49   | Europe                | Cox regression, Score      | 0.74        | Calibration plot                            | No                    |
| Cioffi <sup>11</sup>                                                           | 2012 | Aortic Stenosis | Natural History                   | None                               | Composite (MACE)      | Multi-center  | 1566        | 550              | 79  | 67   | Europe                | Cox regression, Score      | NR          | None                                        | No                    |
| Holme <sup>12</sup> , SEAS Score                                               | 2012 | Aortic Stenosis | Natural History                   | None                               | 5 Year Mortality      | Multi-center  | 772         | 78               | 11  | 67.7 | Europe                | Cox regression             | 0.722       | HL statistic, Calibration plot, Brier score | No                    |
| Kötting <sup>13</sup> , German Aortic Valve Score                              | 2013 | Aortic          | Percutaneous                      | AVR or TAVR                        | In-Hospital Mortality | Multi-center  | 11147       | 416              | 28  | NR   | Europe                | Logistic regression, Score | 0.808       | HL statistic                                | Yes                   |
| Arnold <sup>14</sup> , 6 Month and 1 Year Models                               | 2014 | Aortic Stenosis | Percutaneous                      | TAVR                               | Composite (Non-MACE)  | Multi-center  | 2137        | 704              | 70  | 84   | North America, Europe | Logistic regression        | 0.66        | HL statistics, Calibration plot             | Yes                   |
|                                                                                |      | Aortic Stenosis | Percutaneous                      | TAVR                               | Composite (Non-MACE)  | Multi-center  | 2130        | 1073             | 134 | 84   | North America, Europe | Logistic regression        | 0.66        | HL statistics, Calibration plot             | Yes                   |
| Capodanno <sup>15</sup> , OBSERVANT Score                                      | 2014 | Aortic Stenosis | Percutaneous                      | AVR or TAVR                        | 30 Day Mortality      | Multi-center  | 1256        | 77               | 11  | 81.9 | Europe                | Logistic regression, Score | 0.73        | HL statistic, Calibration plot, Brier score | Yes                   |
| D'Ascenzo <sup>16</sup> , Survival Post-TAVI (STT) - 30 Days and 1 Year Models | 2014 | Aortic          | Percutaneous                      | TAVR                               | 30 Day Mortality      | Multi-center  | 1064        | 60               | 20  | 81.6 | Europe                | Logistic regression, Score | 0.66        | HL statistic                                | Yes                   |
|                                                                                |      | Aortic          | Percutaneous                      | TAVR                               | 1 Year Mortality      | Multi-center  | 1064        | 165              | 55  | 81.6 | Europe                | Logistic regression        | 0.68        | HL statistic                                | Yes                   |

| Author, Model Name                           | Year | Valve          | Standardized Type of Intervention | Specific Intervention  | Outcome               | Centers       | Sample Size | Number of Events | EPV | Age  | Continent     | Model Method               | C-statistic | Calibration Measure                                       | Externally Validated? |
|----------------------------------------------|------|----------------|-----------------------------------|------------------------|-----------------------|---------------|-------------|------------------|-----|------|---------------|----------------------------|-------------|-----------------------------------------------------------|-----------------------|
|                                              |      |                |                                   |                        |                       |               |             |                  |     |      |               | on, Score                  |             |                                                           |                       |
| Iung <sup>17</sup>                           | 2014 | Aortic         | Percutaneous                      | TAVR                   | 30 Day Mortality      | Multi-center  | 2552        | 253              | 28  | 82.9 | Europe        | Logistic regression, Score | 0.67        | HL statistic, Calibration in the large, Calibration plot  | No                    |
| Debonnaire <sup>18</sup> , TAVI2-SCORE       | 2015 | Aortic         | Percutaneous                      | TAVR                   | 1 Year Mortality      | Multi-center  | 509         | 80               | 10  | 82   | Europe        | Cox regression, Score      | 0.715       | HL statistic, Calibration in the large                    | Yes                   |
| Edwards <sup>19</sup>                        | 2016 | Aortic         | Percutaneous                      | TAVR                   | In-Hospital Mortality | Multi-center  | 13672       | 730              | 104 | 82.1 | North America | Logistic regression        | 0.67        | HL statistics, Calibration in the large, Calibration plot | Yes                   |
| <b>Isolated or Multiple Valve (+/- CABG)</b> |      |                |                                   |                        |                       |               |             |                  |     |      |               |                            |             |                                                           |                       |
| Koplan <sup>20</sup>                         | 2003 | All            | Surgery                           | Cardiac Valve Surgery  | Pacemaker Placement   | Single center | 3116        | 168              | 24  | 65   | North America | Logistic regression, Score | NR          | None                                                      | No                    |
| Ambler <sup>21</sup> , Ambler                | 2005 | Aortic, Mitral | Surgery                           | AVR and/or MVR         | In-Hospital Mortality | Multi-center  | 16679       | 1067             | 76  | 64.8 | Europe        | Logistic regression, Score | 0.77        | HL statistic, Calibration plot                            | Yes                   |
| Xu <sup>22</sup>                             | 2006 | All            | Surgery                           | Valve Surgery          | Prolonged LOS         | Single center | 507         | 75               | 11  | 55.5 | Asia          | Logistic regression        | 0.81        | Calibration in table form                                 | No                    |
| Hannan <sup>23</sup>                         | 2007 | Aortic, Mitral | Surgery                           | Isolated Valve Surgery | In-Hospital Mortality | Multi-center  | 10702       | 472              | 43  | NR   | North America | Logistic regression, Score | 0.794       | HL statistic, Calibration plot                            | Yes                   |

| Author, Model Name                                       | Year | Valve          | Standardized Type of Intervention | Specific Intervention  | Outcome               | Centers       | Sample Size | Number of Events | EPV | Age   | Continent     | Model Method               | C-statistic | Calibration Measure                                  | Externally Validated? |
|----------------------------------------------------------|------|----------------|-----------------------------------|------------------------|-----------------------|---------------|-------------|------------------|-----|-------|---------------|----------------------------|-------------|------------------------------------------------------|-----------------------|
| Xu <sup>24</sup> , FUWAI Score                           | 2007 | All            | Surgery                           | Valve Surgery +/- CABG | Prolonged LOS         | Single center | 2193        | 345              | 27  | 53.29 | Asia          | Logistic regression, Score | 0.76        | HL statistic, Calibration plot                       | Yes                   |
| Shi <sup>25</sup>                                        | 2010 | Aortic, Mitral | Surgery                           | AVR and/or MVR         | In-Hospital Mortality | Single center | 158         | 8                | 1   | NR    | Asia          | Logistic regression        | 0.7358      | None                                                 | No                    |
| Ariyaratne <sup>26</sup> , Aus-AVR Score                 | 2011 | Aortic, Mitral | Surgery                           | AVR +/- CABG +/- MVR   | 30 Day Mortality      | Multi-center  | 3544        | 147              | 16  | NR    | Australia     | Logistic regression, Score | 0.78        | HL statistic, Calibration in the large               | Yes                   |
| Nashef <sup>27</sup> , EuroSCORE II                      | 2012 | All            | Surgery                           | Major Cardiac Surgery  | In-Hospital Mortality | Multi-center  | 16828       | 656              | 36  | 64.6  | International | Logistic regression        | 0.8095      | None                                                 | Yes                   |
| Hannan <sup>28</sup> , NY Operative Mortality Risk Score | 2013 | Aortic, Mitral | Surgery                           | Isolated Valve Surgery | 30 Day Mortality      | Multi-center  | 13455       | 542              | 49  | NR    | North America | Logistic regression, Score | 0.781       | HL statistic                                         | Yes                   |
| Wang <sup>29</sup>                                       | 2013 | All            | Surgery                           | Valve Surgery          | Prolonged Ventilation | Single center | 2400        | 303              | 25  | NR    | Asia          | Logistic regression        | 0.789       | HL statistic                                         | No                    |
| Zheng <sup>30</sup>                                      | 2013 | Aortic, Mitral | Surgery                           | AV and/or MV Surgery   | In-Hospital Mortality | Multi-center  | 6677        | 130              | 26  | 48    | Asia          | Logistic regression, Score | 0.76        | HL statistic, Chi-square statistic, Calibration plot | No                    |
| <b>Multiple Valve</b>                                    |      |                |                                   |                        |                       |               |             |                  |     |       |               |                            |             |                                                      |                       |
| Guo <sup>8</sup>                                         | 2010 | Aortic, Mitral | Surgery                           | AVR + MVR              | In-Hospital Mortality | Single center | 818         | 55               | 14  | 58.4  | Asia          | Logistic regression        | NR          | HL statistic                                         | No                    |
| Rankin <sup>31</sup> , AM Preop                          | 2013 | Aortic, Mitral | Surgery                           | AVR + MVR              | 30 Day Mortality      | Multi-center  | 27035       | 2541             | 116 | 70    | North America | Logistic regression        | NR          | Calibration plot                                     | Yes                   |

| Author, Model Name                         | Year | Valve                     | Standardized Type of Intervention | Specific Intervention | Outcome          | Centers      | Sample Size | Number of Events | EPV | Age | Continent     | Model Method        | C-statistic | Calibration Measure | Externally Validated? |
|--------------------------------------------|------|---------------------------|-----------------------------------|-----------------------|------------------|--------------|-------------|------------------|-----|-----|---------------|---------------------|-------------|---------------------|-----------------------|
| Rankin <sup>31</sup> , MT Preop            | 2013 | Mitral, Tricuspid         | Surgery                           | MVR + TVR             | 30 Day Mortality | Multi-center | 18686       | 1420             | 71  | 70  | North America | Logistic regression | NR          | Calibration plot    | Yes                   |
| Rankin <sup>31</sup> , AMT Preop           | 2013 | Aortic, Mitral, Tricuspid | Surgery                           | AVR + MVR + TVR       | 30 Day Mortality | Multi-center | 4510        | 591              | 74  | 71  | North America | Logistic regression | NR          | Calibration plot    | Yes                   |
| Rankin <sup>31</sup> , AM Preop + Intraop  | 2013 | Aortic, Mitral            | Surgery                           | AVR + MVR             | 30 Day Mortality | Multi-center | 27035       | 2541             | 110 | 70  | North America | Logistic regression | NR          | Calibration plot    | Yes                   |
| Rankin <sup>31</sup> , MT Preop + Intraop  | 2013 | Mitral, Tricuspid         | Surgery                           | MVR + TVR             | 30 Day Mortality | Multi-center | 18686       | 1420             | 71  | 70  | North America | Logistic regression | NR          | Calibration plot    | Yes                   |
| Rankin <sup>31</sup> , AMT Preop + Intraop | 2013 | Aortic, Mitral, Tricuspid | Surgery                           | AVR + MVR + TVR       | 30 Day Mortality | Multi-center | 4510        | 591              | 26  | 71  | North America | Logistic regression | NR          | Calibration plot    | Yes                   |

\* 'Isolated Valve' indicates a single valve procedure; 'Multiple Valve' indicates intervention to > 1 valve; AVR indicates aortic valve replacement; MVR, mitral valve replacement; HL, Hosmer-Lemeshow; CABG, coronary artery bypass grafting; NR, not reported; MACE, major adverse cardiovascular events; AEs, adverse events; DSWI, deep sternal wound infections; LOS, length of stay; TAVR, transcatheter aortic valve replacement; TVR, tricuspid valve replacement.



**Table S3. External Validations Overview.**

| <i>De novo</i>                               | <i>Validation</i>                |                                   |                                                              |                        |                  |                    |                         |                    |                              |                                     |
|----------------------------------------------|----------------------------------|-----------------------------------|--------------------------------------------------------------|------------------------|------------------|--------------------|-------------------------|--------------------|------------------------------|-------------------------------------|
| <b>Model</b>                                 | <b>Author, Year</b>              | <b>Index Condition</b>            | <b>Outcome</b>                                               | <b>Timeframe</b>       | <b>Continent</b> | <b>Sample Size</b> | <b>Number of Events</b> | <b>C-statistic</b> | <b>Calibration Reported?</b> | <b>Change in Discrimination (%)</b> |
| <i>Isolated Valve</i>                        |                                  |                                   |                                                              |                        |                  |                    |                         |                    |                              |                                     |
| STS (original) – Isolated Valve <sup>1</sup> | Edwards, 2001 <sup>1</sup>       | AVR or MVR                        | operative mortality                                          | 30 days                | North America    | 25640              | 1231                    | 0.773              | Yes                          | 2.631578947                         |
|                                              | Brown, 2009 <sup>32</sup>        | AVR                               | mortality                                                    | hospitalization period | North America    | 108,687            | 3197                    | NA                 | Yes                          | NA                                  |
| NNE Aortic <sup>2</sup>                      | Jin, 2005 <sup>33</sup>          | AVR                               | operative mortality                                          | until discharge        | North America    | 3324               | 142                     | 0.75               | Yes                          | 0                                   |
|                                              | Ariyaratne, 2011 <sup>26</sup>   | AVR                               | early postop mortality                                       | 30 days                | Australia        | 3544               | 147                     | 0.77               | Yes                          | 8                                   |
|                                              | Wang, 2013 <sup>34</sup>         | valve surgery                     | in-hospital mortality                                        | until discharge        | Asia             | 12412              | 260                     | 0.706              | Yes                          | -17.6                               |
| NNE Mitral <sup>2</sup>                      | Jin, 2005 <sup>33</sup>          | MVR                               | operative mortality                                          | until discharge        | North America    | 1596               | 95                      | 0.81               | Yes                          | 6.896551724                         |
| NWQIP <sup>3</sup>                           | Kuduvalli, 2007 <sup>3</sup>     | AVR +/- CABG                      | in-hospital mortality                                        | hospitalization period | Europe           | 816                | 33                      | 0.78               | Yes                          | 0                                   |
|                                              | Ariyaratne, 2011 <sup>26</sup>   | AVR +/- CABG                      | in-hospital mortality or mortality within 30 days of surgery | 30 days                | Australia        | 3306               | 120                     | 0.77               | Yes                          | -3.571428571                        |
| PMV Score <sup>4</sup>                       | Cruz-Gonzalez, 2009 <sup>4</sup> | percutaneous mitral valvuloplasty | PMV success                                                  | 1 year                 | North America    | 285                | 213                     | NR                 | No                           | NA                                  |
| Monin, 2009 <sup>5</sup>                     | Monin, 2009 <sup>5</sup>         | valve surgery +/- CABG            | morbidity/mortality                                          | mean 21 months         | Europe           | 107                | 56                      | 0.89               | Yes                          | -2.5                                |
| STS (new)– Composite AEs <sup>6</sup>        | Watanabe, 2013 <sup>35</sup>     | TAVR                              | composite safety endpoint                                    | 30 days                | Europe           | 453                | 94                      | 0.59               | No                           | -59.2760181                         |
|                                              | Wang, 2016 <sup>36</sup>         | AVR +/- CABG                      | composite morbidity                                          | 30 days                | Australia        | 450                | 152                     | 0.627              | No                           | -42.53393665                        |
|                                              | Wang, 2017 <sup>37</sup>         | MVR or MVRepair                   | composite morbidity                                          | 30 days                | Australia        | 407                | 77                      | 0.732              | No                           | 4.977375566                         |
| STS (new)– DSWI <sup>6</sup>                 | Wang, 2016 <sup>36</sup>         | AVR +/- CABG                      | DSWI                                                         | 30 days                | Australia        | 450                | 6                       | 0.631              | No                           | -35.78431373                        |
|                                              | Wang, 2017 <sup>37</sup>         | MVR or MVRepair                   | mediastinitis                                                | 30 days                | Australia        | 407                | 4                       | 0.721              | No                           | 8.333333333                         |

| <i>De novo</i>                     | <i>Validation</i>            |                                                        |                           |                              |               |             |                  |             |                       |                              |
|------------------------------------|------------------------------|--------------------------------------------------------|---------------------------|------------------------------|---------------|-------------|------------------|-------------|-----------------------|------------------------------|
| Model                              | Author, Year                 | Index Condition                                        | Outcome                   | Timeframe                    | Continent     | Sample Size | Number of Events | C-statistic | Calibration Reported? | Change in Discrimination (%) |
| STS (new) – Mortality <sup>6</sup> | Piazza, 2010 <sup>38</sup>   | TAVR                                                   | periprocedural mortality  | 30 days                      | Europe        | 168         | 19               | 0.69        | Yes                   | -<br>37.70491803             |
|                                    | Basraon, 2011 <sup>39</sup>  | AVR                                                    | perioperative mortality   | 30 days                      | North America | 537         | 32               | 0.73        | Yes                   | -<br>24.59016393             |
|                                    | Zhang, 2011 <sup>40</sup>    | valve surgery                                          | prolonged postop ICU stay | mean LOS 79.44 +/- 59.76 hrs | Asia          | 1333        | 187              | 0.70        | Yes                   | -<br>34.42622951             |
|                                    | Durand, 2013 <sup>41</sup>   | TAVR                                                   | mortality                 | 30 days                      | Europe        | 250         | 19               | 0.58        | Yes                   | -73.7704918                  |
|                                    | Durand, 2013 <sup>41</sup>   | TAVR (transapical access)                              | mortality                 | 30 days                      | Europe        | 60          | 7                | 0.55        | Yes                   | -<br>83.60655738             |
|                                    | Durand, 2013 <sup>41</sup>   | TAVR (transfemoral access)                             | mortality                 | 30 days                      | Europe        | 190         | 12               | 0.66        | Yes                   | -<br>47.54098361             |
|                                    | Haensig, 2013 <sup>42</sup>  | TA-AVI                                                 | mortality                 | 30 days                      | Europe        | 360         | 38               | 0.64        | Yes                   | -<br>54.09836066             |
|                                    | Haensig, 2013 <sup>42</sup>  | TA-AVI                                                 | in-hospital mortality     | until discharge              | Europe        | 360         | 41               | 0.65        | Yes                   | -<br>50.81967213             |
|                                    | Laurent, 2013 <sup>43</sup>  | AVR                                                    | operative mortality       | 30 days                      | Europe        | 314         | 18               | 0.77        | Yes                   | -<br>11.47540984             |
|                                    | Wang, 2013 <sup>34</sup>     | valve surgery                                          | in-hospital mortality     | until discharge              | Asia          | 12412       | 260              | 0.735       | Yes                   | -<br>22.95081967             |
|                                    | Watanabe, 2013 <sup>35</sup> | TAVR                                                   | mortality                 | 30 days                      | Europe        | 453         | 57               | 0.6         | Yes                   | -<br>67.21311475             |
|                                    | Watanabe, 2013 <sup>35</sup> | TAVR (transfemoral)                                    | mortality                 | 30 days                      | Europe        | 249         | 28               | 0.6         | Yes                   | -<br>67.21311475             |
|                                    | Watanabe, 2013 <sup>35</sup> | TAVR (transfemoral approach, without early experience) | mortality                 | 30 days                      | Europe        | NR          | NR               | 0.65        | Yes                   | -<br>50.81967213             |
|                                    | Watanabe, 2013 <sup>35</sup> | TAVR (transapical/transaortic)                         | mortality                 | 30 days                      | Europe        | 330         | 27               | 0.61        | Yes                   | -<br>63.93442623             |
|                                    | Barili, 2014 <sup>44</sup>   | MV surgery                                             | in-hospital mortality     | until discharge              | Europe        | 1239        | NR               | 0.82        | Yes                   | 4.918032787                  |
| Barili, 2014 <sup>44</sup>         | MV surgery +/- CABG          | in-hospital mortality                                  | until discharge           | Europe                       | 2202          | NR          | 0.76             | Yes         | -<br>14.75409836      |                              |

| <i>De novo</i> | <i>Validation</i>              |                                    |                         |                             |               |             |                  |             |                       |                              |
|----------------|--------------------------------|------------------------------------|-------------------------|-----------------------------|---------------|-------------|------------------|-------------|-----------------------|------------------------------|
| Model          | Author, Year                   | Index Condition                    | Outcome                 | Timeframe                   | Continent     | Sample Size | Number of Events | C-statistic | Calibration Reported? | Change in Discrimination (%) |
|                | Beohar, 2014 <sup>45</sup>     | TAVR                               | mortality               | 30 days                     | North America | 2552        | 165              | 0.6         | Yes                   | -<br>67.21311475             |
|                | Chan, 2014 <sup>46</sup>       | MVR or MVRepair                    | perioperative mortality | 30 days                     | North America | 1154        | 11               | 0.74        | Yes                   | -<br>21.31147541             |
|                | Osnabrugge, 2014 <sup>47</sup> | AVR                                | in-hospital mortality   | until discharge             | North America | 4107        | 119              | 0.74        | Yes                   | -<br>21.31147541             |
|                | Osnabrugge, 2014 <sup>47</sup> | AVR +/- CABG                       | in-hospital mortality   | until discharge             | North America | 3480        | 143              | 0.74        | Yes                   | -<br>21.31147541             |
|                | Osnabrugge, 2014 <sup>47</sup> | MVRepair                           | in-hospital mortality   | until discharge             | North America | 1059        | 13               | 0.86        | Yes                   | 18.03278689                  |
|                | Osnabrugge, 2014 <sup>47</sup> | MVR                                | in-hospital mortality   | until discharge             | North America | 1071        | 59               | 0.79        | Yes                   | -<br>4.918032787             |
|                | Rabbani, 2014 <sup>48</sup>    | valve replacement surgery          | mortality               | 30 days                     | Asia          | 576         | 28               | 0.812       | Yes                   | 2.295081967                  |
|                | Wendt, 2014 <sup>49</sup>      | AVR or TAVR                        | mortality               | 30 days                     | Europe        | 1512        | 95               | 0.708       | Yes                   | -<br>31.80327869             |
|                | Wang, 2014 <sup>50</sup>       | isolated or multiple valve surgery | in-hospital mortality   | until discharge             | Asia          | 9846        | 176              | 0.712       | Yes                   | -<br>30.49180328             |
|                | Adamo, 2015 <sup>51</sup>      | percutaneous MVRepair              | mortality               | 30 days                     | Europe        | 304         | 10               | 0.62        | Yes                   | -60.6557377                  |
|                | Debonnaire, 2015 <sup>18</sup> | TAVR                               | all-cause mortality     | 1 year                      | Europe        | 471         | 80               | 0.5         | Yes                   | -100                         |
|                | Holinski, 2015 <sup>52</sup>   | repeat AVR                         | mortality               | 30 days                     | Europe        | 78          | 8                | 0.64        | Yes                   | -<br>54.09836066             |
|                | Silaschi, 2015 <sup>53</sup>   | TAVR (transfemoral or transapical) | mortality               | 30 days                     | Europe        | 457         | 44               | 0.57        | Yes                   | -<br>77.04918033             |
|                | Silva, 2015 <sup>54</sup>      | TAVR                               | mortality               | 30 days                     | South America | 418         | 38               | 0.54        | Yes                   | -86.8852459                  |
|                | Sinning, 2015 <sup>55</sup>    | TAVR                               | all-cause mortality     | 1 year                      | Europe        | 310         | 80               | 0.685       | No                    | -39.3442623                  |
|                | Tralhao, 2015 <sup>56</sup>    | AVR                                | operative mortality     | 30 days                     | Europe        | 106         | 6                | 0.702       | Yes                   | -33.7704918                  |
|                | Vassileva, 2015 <sup>57</sup>  | repeat AVR after prior CABG        | operative mortality     | median LOS 6 days (IQR 5-9) | North America | 6534        | 236              | NR          | Yes                   | NA                           |

| <i>De novo</i> | <i>Validation</i>             |                       |                              |                 |               |             |                  |             |                       |                              |
|----------------|-------------------------------|-----------------------|------------------------------|-----------------|---------------|-------------|------------------|-------------|-----------------------|------------------------------|
| Model          | Author, Year                  | Index Condition       | Outcome                      | Timeframe       | Continent     | Sample Size | Number of Events | C-statistic | Calibration Reported? | Change in Discrimination (%) |
|                | Wang, 2015 <sup>58</sup>      | AVR                   | operative mortality          | 30 days         | Australia     | 620         | 18               | 0.716       | Yes                   | -<br>29.18032787             |
|                | Wang, 2015 <sup>59</sup>      | AVR                   | post-operative complications | 14 days         | Australia     | 620         | 115              | 0.666       | Yes                   | -<br>45.57377049             |
|                | Barili, 2016 <sup>60</sup>    | AVR                   | mortality                    | 30 days         | Europe        | 1444        | NR               | 0.79        | Yes                   | -<br>4.918032787             |
|                | Collas, 2016 <sup>61</sup>    | TAVR                  | mortality                    | 1 year          | Europe        | 225         | 38               | NR          | No                    | NA                           |
|                | Halkin, 2016 <sup>62</sup>    | TAVR                  | all-cause mortality          | 30 days         | Asia          | 1327        | 45               | 0.68        | No                    | -<br>40.98360656             |
|                | Kortlandt, 2016 <sup>63</sup> | percutaneous MVRepair | periprocedural mortality     | 30 days         | Europe        | 136         | 5                | 0.65        | Yes                   | -<br>50.81967213             |
|                | Peguero, 2016 <sup>64</sup>   | cardiac surgery       | operative mortality          | 30 days         | North America | 2263        | 48               | 0.77        | Yes                   | -<br>11.47540984             |
|                | Rosa, 2016 <sup>65</sup>      | TAVR                  | in-hospital mortality        | until discharge | South America | 59          | 6                | NR          | Yes                   | NA                           |
|                | Rosa, 2016 <sup>65</sup>      | TAVR                  | 30-day mortality             | 30 days         | South America | 59          | 8                | 0.81        | Yes                   | 1.639344262                  |
|                | Wang, 2016 <sup>36</sup>      | AVR +/- CABG          | operative mortality          | 30 days         | Australia     | 450         | 29               | 0.699       | Yes                   | -<br>34.75409836             |
|                | Wang, 2016 <sup>66</sup>      | valve surgery         | in-hospital mortality        | until discharge | Asia          | 12412       | 260              | 0.735       | Yes                   | -<br>22.95081967             |
|                | Yamaoka, 2016 <sup>67</sup>   | AVR +/- CABG          | operative mortality          | 30 days         | Asia          | 406         | 14               | 0.781       | Yes                   | -<br>7.868852459             |
|                | Zbroński, 2016 <sup>68</sup>  | TAVR                  | mortality                    | 30 days         | Europe        | 156         | 15               | 0.55        | Yes                   | -<br>83.60655738             |
|                | Balan, 2017 <sup>69</sup>     | TAVR                  | mortality                    | 30 days         | North America | 426         | 18               | 0.674       | No                    | -<br>42.95081967             |
|                | Balan, 2017 <sup>69</sup>     | SAVR                  | mortality                    | 30 days         | North America | 297         | 14               | 0.791       | No                    | -<br>4.590163934             |
|                | Balan, 2017 <sup>69</sup>     | TAVR (transfemoral)   | mortality                    | 30 days         | North America | NR          | NR               | 0.789       | No                    | -<br>5.245901639             |
|                | Balan, 2017 <sup>69</sup>     | TAVR (transapical)    | mortality                    | 30 days         | North America | NR          | NR               | 0.583       | No                    | -<br>72.78688525             |
|                | Schmid, 2017 <sup>70</sup>    | TAVR                  | all-cause mortality          | 1 year          | Europe        | 74          | 10               | 0.734       | No                    | -<br>23.27868852             |
|                | Schmid, 2017 <sup>70</sup>    | TAVR                  | all-cause mortality          | 2 years         | Europe        | 74          | 18               | 0.646       | No                    | -<br>52.13114754             |
|                | Wang, 2017 <sup>37</sup>      | MVR or MVRepair       | operative mortality          | 30 days         | Australia     | 407         | 10               | 0.850       | Yes                   | 14.75409836                  |

| <i>De novo</i>                                | <i>Validation</i>            |                        |                                          |                  |                  |                    |                         |                    |                              |                                     |
|-----------------------------------------------|------------------------------|------------------------|------------------------------------------|------------------|------------------|--------------------|-------------------------|--------------------|------------------------------|-------------------------------------|
| <b>Model</b>                                  | <b>Author, Year</b>          | <b>Index Condition</b> | <b>Outcome</b>                           | <b>Timeframe</b> | <b>Continent</b> | <b>Sample Size</b> | <b>Number of Events</b> | <b>C-statistic</b> | <b>Calibration Reported?</b> | <b>Change in Discrimination (%)</b> |
| STS (new)– Prolonged LOS <sup>6</sup>         | Wang, 2016 <sup>36</sup>     | AVR +/- CABG           | LOS > 14 days                            | 14 days          | Australia        | 450                | 86                      | 0.638              | No                           | -<br>48.88888889                    |
|                                               | Wang, 2017 <sup>37</sup>     | MVR or MVRepair        | prolonged LOS                            | 14 days          | Australia        | 407                | 56                      | 0.696              | No                           | -<br>27.40740741                    |
| STS (new)– Prolonged Ventilation <sup>6</sup> | Wang, 2016 <sup>36</sup>     | AVR/CABG               | ventilation > 24 hours                   | 30 days          | Australia        | 450                | 124                     | 0.642              | No                           | -<br>47.40740741                    |
|                                               | Wang, 2017 <sup>37</sup>     | MVR or MVRepair        | ventilation > 24 hours                   | 30 days          | Australia        | 407                | 54                      | 0.789              | No                           | -<br>7.037037037                    |
| STS (new)– Renal Failure <sup>6</sup>         | Peguero, 2016 <sup>64</sup>  | valve surgery +/- CABG | operative mortality                      | 30 days          | North America    | 2263               | 48                      | 0.76               | Yes                          | -7.80141844                         |
|                                               | Wang, 2016 <sup>36</sup>     | AVR +/- CABG           | renal failure                            | 30 days          | Australia        | 450                | 6                       | 0.682              | No                           | -<br>35.46099291                    |
|                                               | Wang, 2017 <sup>37</sup>     | MVR or MVRepair        | renal failure                            | 30 days          | Australia        | 407                | 12                      | 0.828              | No                           | -<br>16.31205674                    |
| STS (new)– Reoperation <sup>6</sup>           | Wang, 2016 <sup>36</sup>     | AVR/CABG               | reoperation                              | 30 days          | Australia        | 450                | 54                      | 0.612              | No                           | -<br>21.67832168                    |
|                                               | Wang, 2017 <sup>37</sup>     | MVR or MVRepair        | return to theater                        | 30 days          | Australia        | 407                | 33                      | 0.668              | No                           | -<br>17.48251748                    |
| STS (new)– Stroke <sup>6</sup>                | Peguero, 2016 <sup>64</sup>  | valve surgery +/- CABG | operative mortality                      | 30 days          | North America    | 2263               | 48                      | 0.69               | Yes                          | -2.06185567                         |
|                                               | Wang, 2016 <sup>36</sup>     | AVR/CABG               | stroke                                   | 30 days          | Australia        | 450                | 15                      | 0.642              | No                           | -<br>26.80412371                    |
|                                               | Wang, 2017 <sup>37</sup>     | MVR or MVRepair        | stroke                                   | 30 days          | Australia        | 407                | 7                       | 0.665              | No                           | -<br>14.94845361                    |
| GuaragnaSCORE <sup>7</sup>                    | Sa, 2012 <sup>71</sup>       | valve surgery +/- CABG | perioperative mortality                  | until discharge  | South America    | 491                | 74                      | 0.781              | Yes                          | -12.1875                            |
|                                               | Silva, 2015 <sup>54</sup>    | TAVR                   | mortality                                | 30 days          | South America    | 418                | 38                      | 0.52               | Yes                          | -93.75                              |
| German Aortic Valve Score <sup>13</sup>       | Sinning, 2015 <sup>55</sup>  | TAVR                   | all-cause mortality                      | 1 year           | Europe           | 310                | 80                      | 0.661              | No                           | -<br>47.72727273                    |
|                                               | Sinning, 2015 <sup>55</sup>  | TAVR                   | all-cause mortality or rehospitalization | 1 year           | Europe           | 310                | 132                     | 0.618              | No                           | -<br>61.68831169                    |
|                                               | Halkin, 2016 <sup>62</sup>   | TAVR                   | all-cause mortality                      | 30 days          | Asia             | 1327               | 45                      | 0.52               | No                           | -<br>93.50649351                    |
|                                               | Kalendar, 2017 <sup>72</sup> | AVR                    | mortality                                | until discharge  | Asia             | 35                 | 6                       | 0.647              | Yes                          | -<br>52.27272727                    |
|                                               | Martin, 2017 <sup>73</sup>   | TAVR                   | mortality                                | 30 days          | Europe           | 6676               | 360                     | 0.59               | Yes                          | -<br>70.77922078                    |

| <i>De novo</i>                                   | <i>Validation</i>             |                                                  |                       |                        |               |             |                  |             |                       |                              |
|--------------------------------------------------|-------------------------------|--------------------------------------------------|-----------------------|------------------------|---------------|-------------|------------------|-------------|-----------------------|------------------------------|
| Model                                            | Author, Year                  | Index Condition                                  | Outcome               | Timeframe              | Continent     | Sample Size | Number of Events | C-statistic | Calibration Reported? | Change in Discrimination (%) |
|                                                  | Schmid, 2017 <sup>70</sup>    | TAVR                                             | all-cause mortality   | 1 year                 | Europe        | 74          | 10               | 0.703       | No                    | -<br>34.09090909             |
|                                                  | Schmid, 2017 <sup>70</sup>    | TAVR                                             | all-cause mortality   | 2 years                | Europe        | 74          | 18               | 0.554       | No                    | -<br>82.46753247             |
| Arnold – 6 Month Model <sup>14</sup>             | Arnold, 2016 <sup>74</sup>    | TAVR                                             | poor outcome          | 6 months               | North America | 2830        | 882              | 0.646       | Yes                   | -8.75                        |
| Arnold – 1 Year Model <sup>14</sup>              | Arnold, 2016 <sup>74</sup>    | TAVR                                             | poor outcome          | 1 year                 | North America | 2325        | 1181             | 0.653       | Yes                   | -4.375                       |
| OBSERVANT Score <sup>15</sup>                    | Collas, 2016 <sup>61</sup>    | TAVR                                             | mortality             | 1 year                 | Europe        | 225         | 38               | NR          | No                    | NA                           |
|                                                  | Halkin, 2016 <sup>62</sup>    | TAVR                                             | all-cause mortality   | 30 days                | Asia          | 1327        | 45               | 0.63        | No                    | -<br>43.47826087             |
|                                                  | Zbroński, 2016 <sup>68</sup>  | TAVR                                             | mortality             | 30 days                | Europe        | 156         | 15               | 0.597       | Yes                   | -<br>57.82608696             |
|                                                  | Martin, 2017 <sup>73</sup>    | TAVR                                             | mortality             | 30 days                | Europe        | 6676        | 360              | 0.57        | Yes                   | -<br>69.56521739             |
| Survival Post-TAVI (STT) – 30 days <sup>16</sup> | D’Ascenzo, 2014 <sup>16</sup> | TAVR                                             | mortality             | 30 days                | Europe        | 180         | 13               | 0.66        | Yes                   | 0                            |
|                                                  | Collas, 2016 <sup>61</sup>    | TAVR                                             | mortality             | 1 year                 | Europe        | 225         | 38               | NR          | No                    | NA                           |
| Survival Post-TAVI (STT) – 1 year <sup>16</sup>  | D’Ascenzo, 2014 <sup>16</sup> | TAVR                                             | mortality             | 1 year                 | Europe        | 180         | 63               | 0.67        | Yes                   | -<br>5.555555556             |
| TAVI2-SCORE <sup>18</sup>                        | Collas, 2016 <sup>61</sup>    | TAVR                                             | mortality             | 1 year                 | Europe        | 225         | 38               | NR          | No                    | NA                           |
| Edwards, 2016 <sup>19</sup>                      | Edwards, 2016 <sup>19</sup>   | TAVR                                             | in-hospital mortality | until discharge        | North America | 6868        | 300              | 0.66        | Yes                   | -<br>5.882352941             |
| <i>Isolated or Multiple Valve</i>                |                               |                                                  |                       |                        |               |             |                  |             |                       |                              |
| Ambler <sup>21</sup>                             | De Bacco, 2008 <sup>75</sup>  | implantation of bovine pericardial bioprosthesis | in-hospital mortality | until discharge        | South America | 703         | 101              | 0.729       | Yes                   | -<br>15.18518519             |
|                                                  | Dewey, 2008 <sup>76</sup>     | AVR                                              | mortality             | mean 4.2 +/- 2.7 years | North America | 97          | 39               | NR          | Yes                   | NA                           |
|                                                  | Tran, 2010 <sup>77</sup>      | AVR                                              | mortality             | 1 year                 | North America | 394         | 23               | 0.799       | Yes                   | 10.74074074                  |
|                                                  | Laurent, 2013 <sup>43</sup>   | AVR                                              | operative mortality   | 30 days                | Europe        | 314         | 18               | 0.70        | Yes                   | -<br>25.92592593             |
|                                                  | Wang, 2013 <sup>34</sup>      | valve surgery                                    | in-hospital mortality | until discharge        | Asia          | 3479        | 112              | 0.677       | Yes                   | -<br>34.44444444             |

| <i>De novo</i>              | <i>Validation</i>                   |                                    |                               |                              |               |             |                  |             |                       |                              |
|-----------------------------|-------------------------------------|------------------------------------|-------------------------------|------------------------------|---------------|-------------|------------------|-------------|-----------------------|------------------------------|
| Model                       | Author, Year                        | Index Condition                    | Outcome                       | Timeframe                    | Continent     | Sample Size | Number of Events | C-statistic | Calibration Reported? | Change in Discrimination (%) |
|                             | Silaschi, 2015 <sup>53</sup>        | TAVR (transfemoral or transapical) | mortality                     | 30 days                      | Europe        | 457         | 44               | 0.52        | Yes                   | -<br>92.59259259             |
|                             | Silva, 2015 <sup>54</sup>           | TAVR                               | mortality                     | 30 days                      | South America | 418         | 38               | 0.57        | Yes                   | -<br>74.07407407             |
|                             | Wang, 2016 <sup>66</sup>            | valve surgery                      | in-hospital mortality         | until discharge              | Asia          | 12412       | 260              | 0.674       | Yes                   | -<br>35.55555556             |
|                             | Yamaoka, 2016 <sup>67</sup>         | AVR +/- CABG                       | operative mortality           | 30 days                      | Asia          | 406         | 14               | 0.709       | Yes                   | -<br>22.59259259             |
|                             | Zbroński, 2016 <sup>68</sup>        | TAVR                               | mortality                     | 30 days                      | Europe        | 156         | 15               | 0.54        | Yes                   | -<br>85.18518519             |
| Hannan, 2007 <sup>23</sup>  | Hannan, 2007 <sup>23</sup>          | isolated valve surgery             | in-hospital mortality         |                              | North America | 9662        | 504              | NR          | No                    | NA                           |
|                             | van Gameren, 2008 <sup>78</sup>     | isolated valve surgery             | hospital mortality            | hospitalization period       | Europe        | 904         | 25               | 0.86        | Yes                   | 22.44897959                  |
|                             | Wang, 2013 <sup>34</sup>            | valve surgery +/- CABG             | in-hospital mortality         | hospitalization period       | Asia          | 3479        | 112              | 0.682       | Yes                   | -38.0952381                  |
| FUWAI Score <sup>24</sup>   | Zhang, 2011 <sup>40</sup>           | valve surgery                      | prolonged postop ICU stay     | mean LOS 79.44 +/- 59.76 hrs | Asia          | 1333        | 187              | 0.81        | Yes                   | 19.23076923                  |
| Aus-AVR Score <sup>26</sup> | Ariyaratne, 2011 <sup>26</sup>      | AVR                                | early postoperative mortality | 30 days                      | Australia     | 3544        | 147              | 0.73        | Yes                   | -<br>17.85714286             |
|                             | Wang, 2015 <sup>58</sup>            | AVR                                | operative mortality           | 30 days                      | Australia     | 620         | 18               | 0.716       | Yes                   | -<br>22.85714286             |
|                             | Wang, 2015 <sup>59</sup>            | AVR                                | post-operative complications  | 14 days                      | Australia     | 620         | 115              | 0.618       | Yes                   | -<br>57.85714286             |
| EuroSCORE II <sup>27</sup>  | Barili, 2013 <sup>79</sup>          | MV surgery                         | in-hospital mortality         | until discharge              | Europe        | NR          | NR               | 0.79        | No                    | -<br>6.300484653             |
|                             | Barili, 2013 <sup>79</sup>          | AV, MV, or TV surgery              | in-hospital mortality         | until discharge              | Europe        | NR          | NR               | 0.8         | No                    | -<br>3.069466882             |
|                             | Carnero-Alcazar, 2013 <sup>80</sup> | cardiac surgery                    | post-operative mortality      | 30 days                      | Europe        | 3798        | 215              | 0.85        | Yes                   | 13.08562197                  |
|                             | Chalmers, 2013 <sup>81</sup>        | AVR                                | in-hospital mortality         | until discharge              | Europe        | 814         | 19               | 0.69        | Yes                   | -<br>38.61066236             |
|                             | Chalmers, 2013 <sup>81</sup>        | AVR +/- CABG                       | in-hospital mortality         | until discharge              | Europe        | 517         | 23               | 0.74        | Yes                   | -<br>22.45557351             |
|                             | Chalmers, 2013 <sup>81</sup>        | MV surgery                         | in-hospital mortality         | until discharge              | Europe        | 340         | 5                | 0.87        | Yes                   | 19.54765751                  |

| <i>De novo</i> | <i>Validation</i>            |                                                        |                       |                 |           |             |                  |             |                       |                              |
|----------------|------------------------------|--------------------------------------------------------|-----------------------|-----------------|-----------|-------------|------------------|-------------|-----------------------|------------------------------|
| Model          | Author, Year                 | Index Condition                                        | Outcome               | Timeframe       | Continent | Sample Size | Number of Events | C-statistic | Calibration Reported? | Change in Discrimination (%) |
|                | Durand, 2013 <sup>41</sup>   | TAVR (all)                                             | mortality             | 30 days         | Europe    | 250         | 19               | 0.66        | Yes                   | -<br>48.30371567             |
|                | Durand, 2013 <sup>41</sup>   | TAVR (transapical)                                     | mortality             | 30 days         | Europe    | 60          | 7                | 0.52        | Yes                   | -<br>93.53796446             |
|                | Durand, 2013 <sup>41</sup>   | TAVR (transfemoral)                                    | mortality             | 30 days         | Europe    | 190         | 12               | 0.71        | Yes                   | -<br>32.14862682             |
|                | Haensig, 2013 <sup>42</sup>  | TA-AVI                                                 | in-hospital mortality | until discharge | Europe    | 360         | 38               | 0.51        | Yes                   | -<br>96.76898223             |
|                | Haensig, 2013 <sup>42</sup>  | TA-AVI                                                 | mortality             | 30 days         | Europe    | 360         | 41               | 0.50        | Yes                   | -100                         |
|                | Howell, 2013 <sup>82</sup>   | valve surgery +/- CABG                                 | in-hospital mortality | until discharge | Europe    | 933         | 90               | 0.67        | Yes                   | -45.0726979                  |
|                | Sedaghat, 2013 <sup>83</sup> | TAVR (transfemoral)                                    | mortality             | 30 days         | Europe    | 206         | 14               | 0.71        | Yes                   | -<br>32.14862682             |
|                | Sedaghat, 2013 <sup>83</sup> | TAVR (transfemoral)                                    | mortality             | 1 year          | Europe    | 206         | 56               | 0.70        | Yes                   | -<br>35.37964459             |
|                | Wang, 2013 <sup>34</sup>     | valve surgery                                          | in-hospital mortality | until discharge | Asia      | 12412       | 260              | 0.693       | Yes                   | -<br>37.64135703             |
|                | Watanabe, 2013 <sup>35</sup> | TAVR                                                   | mortality             | 30 days         | Europe    | 453         | 57               | 0.68        | Yes                   | -<br>41.84168013             |
|                | Watanabe, 2013 <sup>35</sup> | TAVR (transfemoral)                                    | mortality             | 30 days         | Europe    | 249         | 28               | 0.74        | Yes                   | -<br>22.45557351             |
|                | Watanabe, 2013 <sup>35</sup> | TAVR (transfemoral approach, without early experience) | mortality             | 30 days         | Europe    | NR          | NR               | 0.75        | Yes                   | -<br>19.22455574             |
|                | Watanabe, 2013 <sup>35</sup> | TAVR (transapical/tra nsao rtic)                       | mortality             | 30 days         | Europe    | 330         | 27               | 0.61        | Yes                   | -<br>64.45880452             |
|                | Zhang, 2013 <sup>84</sup>    | isolated or multiple valve surgery                     | in-hospital mortality | until discharge | Asia      | 3479        | 112              | 0.69        | Yes                   | -<br>40.22617124             |
|                | Zhang, 2013 <sup>84</sup>    | isolated valve surgery                                 | in-hospital mortality | until discharge | Asia      | 1106        | 26               | 0.792       | Yes                   | -<br>5.654281099             |
|                | Zhang, 2013 <sup>84</sup>    | multiple valve surgery                                 | in-hospital mortality | until discharge | Asia      | 2373        | 86               | 0.605       | Yes                   | -<br>66.07431341             |
|                | Barili, 2014 <sup>44</sup>   | isolated MV surgery                                    | in-hospital mortality | until discharge | Europe    | 1239        | NR               | 0.81        | Yes                   | 0.161550889                  |



| <i>De novo</i> | <i>Validation</i>                |                                |                         |                 |               |             |                  |             |                       |                              |
|----------------|----------------------------------|--------------------------------|-------------------------|-----------------|---------------|-------------|------------------|-------------|-----------------------|------------------------------|
| Model          | Author, Year                     | Index Condition                | Outcome                 | Timeframe       | Continent     | Sample Size | Number of Events | C-statistic | Calibration Reported? | Change in Discrimination (%) |
|                | Barili, 2014 <sup>44</sup>       | associated MV surgery          | in-hospital mortality   | until discharge | Europe        | NR          | NR               | 0.75        | Yes                   | -<br>19.22455574             |
|                | Barili, 2014 <sup>44</sup>       | MV surgery +/- CABG            | in-hospital mortality   | until discharge | Europe        | NR          | NR               | 0.74        | Yes                   | -<br>22.45557351             |
|                | Barili, 2014 <sup>85</sup>       | elective major cardiac surgery | in-hospital mortality   | until discharge | Europe        | 12201       | 210              | 0.80        | Yes                   | -<br>3.069466882             |
|                | Kosztka, 2014 <sup>86</sup>      | major cardiac surgery          | mortality               | 30 days         | Europe        | 2287        | 123              | 0.8177      | Yes                   | 2.649434572                  |
|                | Osnabrugge, 2014 <sup>47</sup>   | AVR                            | in-hospital mortality   | until discharge | North America | 4107        | 119              | 0.71        | Yes                   | -<br>32.14862682             |
|                | Osnabrugge, 2014 <sup>47</sup>   | AVR +/- CABG                   | in-hospital mortality   | until discharge | North America | 3480        | 143              | 0.72        | Yes                   | -<br>28.91760905             |
|                | Osnabrugge, 2014 <sup>47</sup>   | MVRepair                       | in-hospital mortality   | until discharge | North America | 1059        | 13               | 0.82        | Yes                   | 3.392568659                  |
|                | Osnabrugge, 2014 <sup>47</sup>   | MVR                            | in-hospital mortality   | until discharge | North America | 1071        | 59               | 0.78        | Yes                   | -<br>9.531502423             |
|                | Rabbani, 2014 <sup>48</sup>      | valve replacement surgery      | mortality               | 30 days         | Asia          | 576         | 28               | 0.816       | Yes                   | 2.100161551                  |
|                | Rabbani, 2014 <sup>48</sup>      | MVR                            | mortality               | 30 days         | Asia          | 247         | 7                | 0.898       | Yes                   | 28.59450727                  |
|                | Rabbani, 2014 <sup>48</sup>      | AVR                            | mortality               | 30 days         | Asia          | 137         | 4                | 0.747       | Yes                   | -<br>20.19386107             |
|                | Rabbani, 2014 <sup>48</sup>      | DVR                            | mortality               | 30 days         | Asia          | 86          | 2                | 0.637       | Yes                   | -<br>55.73505654             |
|                | Rabbani, 2014 <sup>48</sup>      | MVR +/- CABG                   | mortality               | 30 days         | Asia          | 57          | 11               | 0.773       | Yes                   | -<br>11.79321486             |
|                | Rabbani, 2014 <sup>48</sup>      | AVR +/- CABG                   | mortality               | 30 days         | Asia          | 49          | 4                | 0.521       | Yes                   | -<br>93.21486268             |
|                | Spiliopoulos, 2014 <sup>87</sup> | AVR +/- CABG                   | perioperative mortality | 30 days         | Europe        | 222         | 14               | 0.77        | Yes                   | -<br>12.76252019             |
|                | Spiliopoulos, 2014 <sup>87</sup> | AVR +/- CABG                   | late mortality          | beyond 30 days  | Europe        | 202         | 21               | 0.718       | Yes                   | -29.5638126                  |
|                | Wang, 2014 <sup>88</sup>         | valve surgery                  | in-hospital mortality   | until discharge | Asia          | 11170       | 226              | 0.72        | Yes                   | -<br>28.91760905             |
|                | Wang, 2014 <sup>88</sup>         | isolated non-CABG surgery      | in-hospital mortality   | until discharge | Asia          | 3696        | NR               | 0.76        | Yes                   | -<br>15.99353796             |
|                | Wang, 2014 <sup>88</sup>         | 2 procedures                   | in-hospital mortality   | until discharge | Asia          | 5006        | NR               | 0.67        | Yes                   | -45.0726979                  |

| <i>De novo</i> | <i>Validation</i>                |                                       |                          |                 |               |             |                  |             |                       |                              |
|----------------|----------------------------------|---------------------------------------|--------------------------|-----------------|---------------|-------------|------------------|-------------|-----------------------|------------------------------|
| Model          | Author, Year                     | Index Condition                       | Outcome                  | Timeframe       | Continent     | Sample Size | Number of Events | C-statistic | Calibration Reported? | Change in Discrimination (%) |
|                | Wang, 2014 <sup>88</sup>         | 3+ procedures                         | in-hospital mortality    | until discharge | Asia          | 2468        | NR               | 0.73        | Yes                   | -<br>25.68659128             |
|                | Wendt, 2014 <sup>49</sup>        | AVR or TAVR                           | mortality                | 30 days         | Europe        | 1512        | 95               | 0.712       | Yes                   | -<br>31.50242326             |
|                | Wendt, 2014 <sup>49</sup>        | TAVR (transfemoral)                   | mortality                | 30 days         | Europe        | 291         | 34               | 0.554       | Yes                   | -<br>82.55250404             |
|                | Wendt, 2014 <sup>49</sup>        | TAVR (transapical)                    | mortality                | 30 days         | Europe        | 155         | 12               | 0.837       | Yes                   | 8.885298869                  |
|                | Debonnaire, 2015 <sup>18</sup>   | TAVR                                  | all-cause mortality      | 1 year          | Europe        | 471         | 80               | 0.633       | Yes                   | -<br>57.02746365             |
|                | Holinski, 2015 <sup>52</sup>     | repeat AVR                            | mortality                | 30 days         | Europe        | 78          | 8                | 0.86        | Yes                   | 16.31663974                  |
|                | Moscarelli, 2015 <sup>89</sup>   | minimally invasive MV surgery +/- TVR | in-hospital mortality    | until discharge | Europe        | 1609        | 28               | 0.846       | Yes                   | 11.79321486                  |
|                | Poullis, 2015 <sup>90</sup>      | AVR                                   | in-hospital mortality    | until discharge | Europe        | 814         | NR               | NR          | Yes                   | NA                           |
|                | Poullis, 2015 <sup>90</sup>      | MVR                                   | in-hospital mortality    | until discharge | Europe        | 340         | NR               | NR          | Yes                   | NA                           |
|                | Poullis, 2015 <sup>90</sup>      | AVR +/- CABG                          | in-hospital mortality    | until discharge | Europe        | 517         | NR               | NR          | Yes                   | NA                           |
|                | Silaschi, 2015 <sup>53</sup>     | TAVR (transfemoral or transapical)    | mortality                | 30 days         | Europe        | 457         | 44               | 0.54        | Yes                   | -<br>87.07592892             |
|                | Silva, 2015 <sup>54</sup>        | TAVR                                  | mortality                | 30 days         | South America | 418         | 38               | 0.54        | Yes                   | -<br>87.07592892             |
|                | Tralhao, 2015 <sup>56</sup>      | AVR                                   | operative mortality      | 30 days         | Europe        | 106         | 6                | 0.792       | Yes                   | -<br>5.654281099             |
|                | Wang, 2015 <sup>58</sup>         | AVR                                   | operative mortality      | 30 days         | Australia     | 620         | 18               | 0.711       | Yes                   | -<br>31.82552504             |
|                | Wang, 2015 <sup>59</sup>         | AVR                                   | morbidity/mortality      | 30 days         | Australia     | 620         | 115              | 0.649       | Yes                   | -<br>51.85783522             |
|                | Halkin, 2016 <sup>62</sup>       | TAVR                                  | all-cause mortality      | 30 days         | Asia          | 1327        | 45               | 0.70        | No                    | -<br>35.37964459             |
|                | Kortlandt, 2016 <sup>63</sup>    | MVR                                   | periprocedural mortality | 30 days         | Europe        | 136         | 5                | 0.54        | Yes                   | -<br>87.07592892             |
|                | Patrat-Delon, 2016 <sup>91</sup> | cardiac surgery for acute             | in-hospital mortality    | until discharge | Europe        | 149         | 32               | 0.78        | Yes                   | -<br>9.531502423             |

| <i>De novo</i> | <i>Validation</i>                 |                                   |                          |                 |               |             |                  |             |                       |                              |
|----------------|-----------------------------------|-----------------------------------|--------------------------|-----------------|---------------|-------------|------------------|-------------|-----------------------|------------------------------|
| Model          | Author, Year                      | Index Condition                   | Outcome                  | Timeframe       | Continent     | Sample Size | Number of Events | C-statistic | Calibration Reported? | Change in Discrimination (%) |
|                |                                   | infective endocarditis            |                          |                 |               |             |                  |             |                       |                              |
|                | Rosa, 2016 <sup>65</sup>          | TAVR                              | mortality                | 30 days         | South America | 59          | 8                | 0.77        | Yes                   | -<br>12.76252019             |
|                | Wang, 2016 <sup>36</sup>          | AVR/CABG                          | operative mortality      | 30 days         | Australia     | 450         | 29               | 0.669       | Yes                   | -<br>45.39579968             |
|                | Wang, 2016 <sup>66</sup>          | valve surgery                     | in-hospital mortality    | until discharge | Asia          | 12412       | 260              | 0.704       | Yes                   | -<br>34.08723748             |
|                | Yamaoka, 2016 <sup>67</sup>       | AVR +/- CABG                      | operative mortality      | 30 days         | Asia          | 406         | 14               | 0.704       | Yes                   | -<br>34.08723748             |
|                | Allyn, 2017 <sup>92</sup>         | elective cardiac surgery with CPB | post-operative mortality | until discharge | Europe        | 6520        | 411              | 0.737       | No                    | -<br>23.42487884             |
|                | Bomberg, 2017 <sup>93</sup>       | cardiac surgery                   | mortality                | 30 days         | Europe        | 856         | 27               | 0.74        | No                    | -<br>22.45557351             |
|                | Bomberg, 2017 <sup>93</sup>       | cardiac surgery                   | mortality                | 6 months        | Europe        | 809         | 49               | 0.76        | No                    | -<br>15.99353796             |
|                | Bomberg, 2017 <sup>93</sup>       | cardiac surgery                   | mortality                | 2 years         | Europe        | 809         | 84               | 0.74        | No                    | -<br>22.45557351             |
|                | Kalender, 2017 <sup>72</sup>      | AVR                               | mortality                | until discharge | Asia          | 35          | 6                | 0.603       | Yes                   | -<br>66.72051696             |
|                | Kar, 2017 <sup>94</sup>           | valve surgery +/- CABG            | mortality                | until discharge | Asia          | 911         | 52               | 0.76        | Yes                   | -<br>15.99353796             |
|                | Kar, 2017 <sup>94</sup>           | valve surgery                     | mortality                | until discharge | Asia          | 427         | 18               | 0.83        | Yes                   | -<br>6.62358643              |
|                | Kar, 2017 <sup>94</sup>           | valve surgery +/- CABG            | mortality                | until discharge | Asia          | 49          | 5                | 0.78        | Yes                   | -<br>9.531502423             |
|                | Mateos-Pañero, 2017 <sup>95</sup> | valve surgery +/- CABG            | mortality                | until discharge | Europe        | 866         | 53               | 0.861       | Yes                   | -<br>16.63974152             |
|                | Mateos-Pañero, 2017 <sup>95</sup> | valve surgery                     | mortality                | until discharge | Europe        | 427         | NR               | 0.767       | Yes                   | -<br>13.73182553             |
|                | Mateos-Pañero, 2017 <sup>95</sup> | valve surgery +/- CABG            | mortality                | until discharge | Europe        | 119         | NR               | 0.954       | Yes                   | -<br>46.68820679             |
|                | Schmid, 2017 <sup>70</sup>        | TAVR                              | all-cause mortality      | 1 year          | Europe        | 74          | 10               | 0.669       | No                    | -<br>45.39579968             |
|                | Schmid, 2017 <sup>70</sup>        | TAVR                              | all-cause mortality      | 2 years         | Europe        | 74          | 18               | 0.552       | No                    | -<br>83.19870759             |
|                | Wang, 2017 <sup>37</sup>          | MVR or MVRepair                   | operative mortality      | 30 days         | Australia     | 407         | 10               | 0.817       | Yes                   | -<br>2.423263328             |

| <i>De novo</i>                                  | <i>Validation</i>          |                        |                              |                        |                  |                    |                         |                    |                              |                                     |
|-------------------------------------------------|----------------------------|------------------------|------------------------------|------------------------|------------------|--------------------|-------------------------|--------------------|------------------------------|-------------------------------------|
| <b>Model</b>                                    | <b>Author, Year</b>        | <b>Index Condition</b> | <b>Outcome</b>               | <b>Timeframe</b>       | <b>Continent</b> | <b>Sample Size</b> | <b>Number of Events</b> | <b>C-statistic</b> | <b>Calibration Reported?</b> | <b>Change in Discrimination (%)</b> |
| NY Operative Mortality Risk Score <sup>28</sup> | Hannan, 2013 <sup>28</sup> | isolated valve surgery | in-hospital/30-day mortality | 30 days                | North America    | 12354              | NR                      | NR                 | No                           | NA                                  |
|                                                 | Jin, 2013 <sup>96</sup>    | isolated valve surgery | in-hospital/30-day mortality | 30 days                | Europe           | 4021               | 105                     | 0.777              | Yes                          | -<br>1.423487544                    |
|                                                 | Wang, 2016 <sup>66</sup>   | isolated valve surgery | in-hospital mortality        | hospitalization period | Asia             | 5152               | 84                      | 0.683              | Yes                          | -<br>34.87544484                    |
| <b><i>Multiple Valve</i></b>                    |                            |                        |                              |                        |                  |                    |                         |                    |                              |                                     |
| AM Preop <sup>31</sup>                          | Rankin, 2013 <sup>31</sup> | AV + MV surgery        | operative mortality          | 30 days                | North America    | NR                 | NR                      | 0.71               | Yes                          | NA                                  |
| MT Preop <sup>31</sup>                          | Rankin, 2013 <sup>31</sup> | AV + MV surgery        | operative mortality          | 30 days                | North America    | NR                 | NR                      | 0.722              | Yes                          | NA                                  |
| AMT Preop <sup>31</sup>                         | Rankin, 2013 <sup>31</sup> | AV + MV surgery        | operative mortality          | 30 days                | North America    | NR                 | NR                      | 0.702              | Yes                          | NA                                  |
| AM Preop + Intraop <sup>31</sup>                | Rankin, 2013 <sup>31</sup> | AV + MV surgery        | operative mortality          | 30 days                | North America    | NR                 | NR                      | 0.714              | Yes                          | NA                                  |
| MT Preop + Intraop <sup>31</sup>                | Rankin, 2013 <sup>31</sup> | AV + MV surgery        | operative mortality          | 30 days                | North America    | NR                 | NR                      | 0.727              | Yes                          | NA                                  |
| AMT Preop + Intraop <sup>31</sup>               | Rankin, 2013 <sup>31</sup> | AV + MV surgery        | operative mortality          | 30 days                | North America    | NR                 | NR                      | 0.706              | Yes                          | NA                                  |

\* 'Isolated Valve' indicates a single valve procedure; 'Multiple Valve' indicates intervention to > 1 valve; AVR indicates aortic valve surgery (repair or replacement); HL, Hosmer-Lemeshow; MVR, mitral valve surgery (repair or replacement); NR, not reported; NA, not applicable; CABG, coronary artery bypass grafting; TAVR, transcatheter aortic valve replacement; TA-AVI, transapical aortic valve implantation; AEs, adverse events; TVR, tricuspid valve surgery (repair or replacement); DVR, double valve surgery (repair or replacement); MACE, major adverse cardiovascular events.

**Figure S1. Literature Search Overview.**

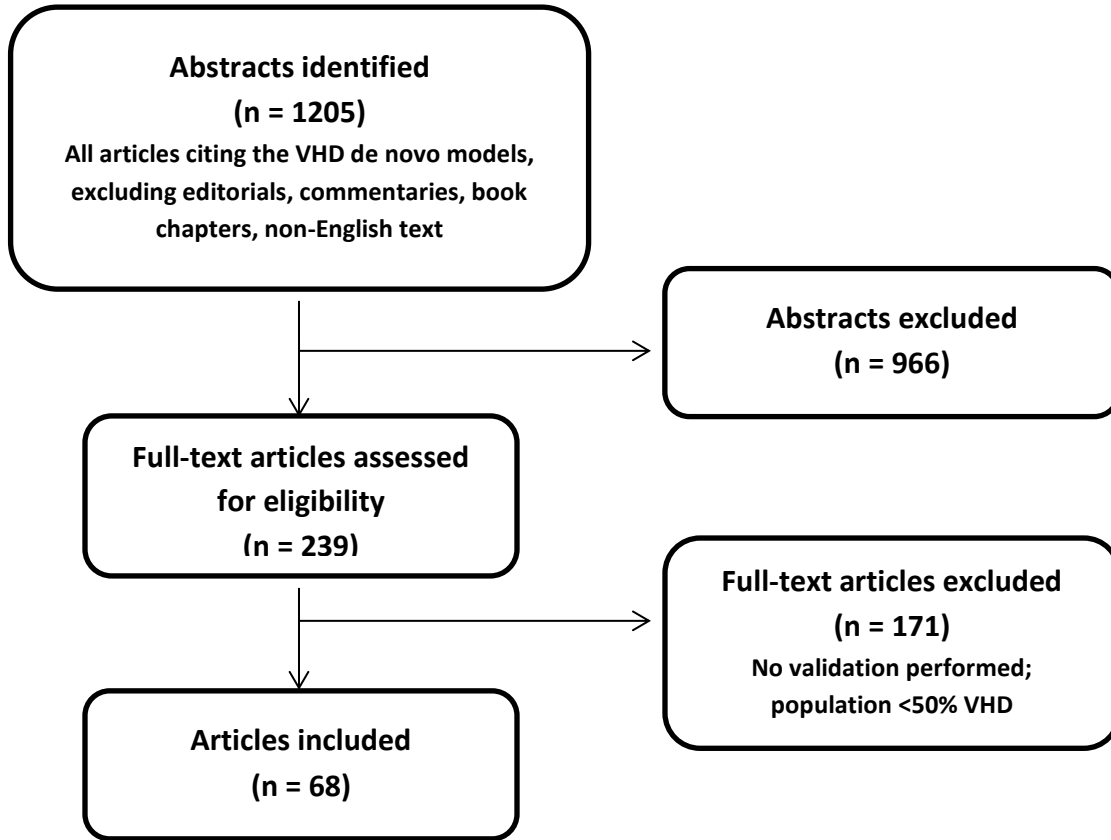

## Supplemental References:

1. Edwards FH, Peterson ED, Coombs LP, DeLong ER, Jamieson WR, Shroyer ALW, Grover FL. Prediction of Operative Mortality after Valve Replacement Surgery. *J Am Coll Cardiol*. 2001;37:885-892.
2. Nowicki ER, Birkmeyer NJ, Weintraub RW, Leavitt BJ, Sanders JH, Dacey LJ, Clough RA, Quinn RD, Charlesworth DC, Sisto DA, Uhlig PN, Olmstead EM, O'Connor GT, Northern New England Cardiovascular Disease Study Group and the Center for Evaluative Clinical Sciences, Dartmouth Medical School. Multivariable Prediction of in-Hospital Mortality Associated with Aortic and Mitral Valve Surgery in Northern New England. *Ann Thorac Surg*. 2004;77:1966-1977.
3. Kuduvali M, Grayson AD, Au J, Grotte G, Bridgewater B, Fabri BM, North West Quality Improvement Programme in Cardiac Interventions. A Multi-Centre Additive and Logistic Risk Model for in-Hospital Mortality Following Aortic Valve Replacement. *Eur J Cardiothorac Surg*. 2007;31:607-613.
4. Cruz-Gonzalez I, Sanchez-Ledesma M, Sanchez PL, Martin-Moreiras J, Jneid H, Rengifo-Moreno P, Inglessis-Azuaje I, Maree AO, Palacios IF. Predicting Success and Long-Term Outcomes of Percutaneous Mitral Valvuloplasty: A Multifactorial Score. *Am J Med*. 2009;122:581.e511-589.
5. Monin JL, Lancellotti P, Monchi M, Lim P, Weiss E, Pierard L, Gueret P. Risk Score for Predicting Outcome in Patients with Asymptomatic Aortic Stenosis. *Circulation*. 2009;120:69-75.
6. O'Brien SM, Shahian DM, Filardo G, Ferraris VA, Haan CK, Rich JB, Normand SL, DeLong ER, Shewan CM, Dokholyan RS, Peterson ED, Edwards FH, Anderson RP, Society of Thoracic Surgeons Quality Measurement Task Force. The Society of Thoracic Surgeons 2008 Cardiac Surgery Risk Models: Part 2--Isolated Valve Surgery. *Ann Thorac Surg*. 2009;88:S23-42.
7. Guaragna JC, Bodanese LC, Bueno FL, Goldani MA. Proposed Preoperative Risk Score for Patients Candidate to Cardiac Valve Surgery. *Arq Bras Cardiol*. 2010;94:541-548.
8. Guo LX, Meng X, Zhang ZG, Bai T. Analysis of Risk Factors for Valve Replacements in 5,128 Cases from a Single Heart Center in China. *Chin Med J (Engl)*. 2010;123:3509-3514.
9. Elmariah S, Lubitz SA, Shah AM, Miller MA, Kaplish D, Kothari S, Moreno PR, Kini AS, Sharma SK. A Novel Clinical Prediction Rule for 30-Day Mortality Following Balloon Aortic Valvuloplasty: The Crrac the Av Score. *Catheter Cardiovasc Interv*. 2011;78:112-118.
10. Bouleti C, lung B, Laouenan C, Himbert D, Brochet E, Messika-Zeitoun D, Detaint D, Garbarz E, Cormier B, Michel PL, Mentre F, Vahanian A. Late Results of Percutaneous Mitral Commissurotomy up to 20 Years: Development and Validation of a Risk Score Predicting Late Functional Results from a Series of 912 Patients. *Circulation*. 2012;125:2119-2127.
11. Cioffi G, Cramariuc D, Dalsgaard M, Davidsen ES, Egstrup K, Rossebo AB, de Simone G, Gerdt E. Left Atrial Systolic Force and Outcome in Asymptomatic Mild to Moderate Aortic Stenosis. *Echocardiography*. 2012;29:1038-1044.
12. Holme I, Pedersen TR, Boman K, Egstrup K, Gerdt E, Kesaniemi YA, Malbecq W, Ray S, Rossebo AB, Wachtell K, Willenheimer R, Gohlke-Barwolf C. A Risk Score for Predicting Mortality in Patients with Asymptomatic Mild to Moderate Aortic Stenosis. *Heart*. 2012;98:377-383.

13. Kotting J, Schiller W, Beckmann A, Schafer E, Dobler K, Hamm C, Veit C, Welz A. German Aortic Valve Score: A New Scoring System for Prediction of Mortality Related to Aortic Valve Procedures in Adults. *Eur J Cardiothorac Surg*. 2013;43:971-977.
14. Arnold SV, Reynolds MR, Lei Y, Magnuson EA, Kirtane AJ, Kodali SK, Zajarias A, Thourani VH, Green P, Rodes-Cabau J, Beohar N, Mack MJ, Leon MB, Cohen DJ, PARTNER Investigators. Predictors of Poor Outcomes after Transcatheter Aortic Valve Replacement: Results from the Partner (Placement of Aortic Transcatheter Valve) Trial. *Circulation*. 2014;129:2682-2690.
15. Capodanno D, Barbanti M, Tamburino C, D'Errigo P, Ranucci M, Santoro G, Santini F, Onorati F, Grossi C, Covello RD, Capranzano P, Rosato S, Seccareccia F, OBSERVANT Research Group. A Simple Risk Tool (the Observant Score) for Prediction of 30-Day Mortality after Transcatheter Aortic Valve Replacement. *Am J Cardiol*. 2014;113:1851-1858.
16. D'Ascenzo F, Capodanno D, Tarantini G, Nijhoff F, Ciuca C, Rossi ML, Brambilla N, Barbanti M, Napodano M, Stella P, Saia F, Ferrante G, Tamburino C, Gasparetto V, Agostoni P, Marzocchi A, Presbitero P, Bedogni F, Cerrato E, Omede P, Conrotto F, Salizzoni S, Biondi Zoccai G, Marra S, Rinaldi M, Gaita F, D'Amico M, Moretti C. Usefulness and Validation of the Survival Post Tavi Score for Survival after Transcatheter Aortic Valve Implantation for Aortic Stenosis. *Am J Cardiol*. 2014;114:1867-1874.
17. lung B, Laouenan C, Himbert D, Eltchaninoff H, Chevreul K, Donzeau-Gouge P, Fajadet J, Leprince P, Leguerrier A, Lievre M, Prat A, Teiger E, Laskar M, Vahanian A, Gilard M, FRANCE 2 Investigators. Predictive Factors of Early Mortality after Transcatheter Aortic Valve Implantation: Individual Risk Assessment Using a Simple Score. *Heart*. 2014;100:1016-1023.
18. Debonnaire P, Fusini L, Wolterbeek R, Kamperidis V, van Rosendael P, van der Kley F, Katsanos S, Joyce E, Tamborini G, Muratori M, Gripari P, Bax JJ, Marsan NA, Pepi M, Delgado V. Value of the "Tavi2-Score" Versus Surgical Risk Scores for Prediction of One Year Mortality in 511 Patients Who Underwent Transcatheter Aortic Valve Implantation. *Am J Cardiol*. 2015;115:234-242.
19. Edwards FH, Cohen DJ, O'Brien SM, Peterson ED, Mack MJ, Shahian DM, Grover FL, Tuzcu EM, Thourani VH, Carroll J, Brennan JM, Brindis RG, Rumsfeld J, Holmes DR, Jr., Steering Committee of the Society of Thoracic Surgeons/American College of Cardiology Transcatheter Valve Therapy Registry. Development and Validation of a Risk Prediction Model for in-Hospital Mortality after Transcatheter Aortic Valve Replacement. *JAMA Cardiol*. 2016;1:46-52.
20. Koplán BA, Stevenson WG, Epstein LM, Aranki SF, Maisel WH. Development and Validation of a Simple Risk Score to Predict the Need for Permanent Pacing after Cardiac Valve Surgery. *J Am Coll Cardiol*. 2003;41:795-801.
21. Ambler G, Omar RZ, Royston P, Kinsman R, Keogh BE, Taylor KM. Generic, Simple Risk Stratification Model for Heart Valve Surgery. *Circulation*. 2005;112:224-231.
22. Xu J, Ge Y, Pan S, Liu F, Shi Y. A Preoperative and Intraoperative Predictive Model of Prolonged Intensive Care Unit Stay for Valvular Surgery. *J Heart Valve Dis*. 2006;15:219-224.
23. Hannan EL, Wu C, Bennett EV, Carlson RE, Culliford AT, Gold JP, Higgins RS, Smith CR, Jones RH. Risk Index for Predicting in-Hospital Mortality for Cardiac Valve Surgery. *Ann Thorac Surg*. 2007;83:921-929.
24. Xu J, Ge Y, Hu S, Song Y, Sun H, Liu P. A Simple Predictive Model of Prolonged Intensive Care Unit Stay after Surgery for Acquired Heart Valve Disease. *J Heart Valve Dis*. 2007;16:109-115.
25. Shi JH, Meng X, Han J, Li Y, Wang JG, Zhang HB, Jia YX, Gurbanov E, Zhuang XJ. A Mortality Risk Assessment Model for Cardiac Valve Replacement Surgery and Its Application in the Use of Prophylactic Extracorporeal Membrane Oxygenation. *Int Surg*. 2010;95:227-231.

26. Ariyaratne TV, Billah B, Yap CH, Dinh D, Smith JA, Shardey GC, Reid CM. An Australian Risk Prediction Model for Determining Early Mortality Following Aortic Valve Replacement. *Eur J Cardiothorac Surg.* 2011;39:815-821.
27. Nashef SA, Roques F, Sharples LD, Nilsson J, Smith C, Goldstone AR, Lockowandt U. Euroscore II. *Eur J Cardiothorac Surg.* 2012;41:734-744; discussion 744-735.
28. Hannan EL, Racz M, Culliford AT, Lahey SJ, Wechsler A, Jordan D, Gold JP, Higgins RS, Smith CR. Risk Score for Predicting in-Hospital/30-Day Mortality for Patients Undergoing Valve and Valve/Coronary Artery Bypass Graft Surgery. *Ann Thorac Surg.* 2013;95:1282-1290.
29. Wang C, Zhang GX, Lu FL, Li BL, Zou LJ, Han L, Xu ZY. A Local Risk Prediction Model for Prolonged Ventilation after Adult Heart Valve Surgery in a Chinese Single Center. *Heart Lung.* 2013;42:13-18.
30. Zheng Z, Fan H, Gao H, Li X, Yuan X, Meng J, Xu J, Song Y, Sun H, Hu S. Mortality Risk Model for Heart Valve Surgery in China. *J Heart Valve Dis.* 2013;22:93-101.
31. Rankin JS, He X, O'Brien SM, Jacobs JP, Welke KF, Filardo G, Shahian DM. The Society of Thoracic Surgeons Risk Model for Operative Mortality after Multiple Valve Surgery. *Ann Thorac Surg.* 2013;95:1484-1490.
32. Brown JM, O'Brien SM, Wu C, Sikora JA, Griffith BP, Gammie JS. Isolated Aortic Valve Replacement in North America Comprising 108,687 Patients in 10 Years: Changes in Risks, Valve Types, and Outcomes in the Society of Thoracic Surgeons National Database. *J Thorac Cardiovasc Surg.* 2009;137:82-90.
33. Jin R, Grunkemeier GL, Starr A, Providence Health System Cardiovascular Study Group. Validation and Refinement of Mortality Risk Models for Heart Valve Surgery. *Ann Thorac Surg.* 2005;80:471-479.
34. Wang C, Li X, Lu FL, Xu JB, Tang H, Han L, Xu ZY. Comparison of Six Risk Scores for in-Hospital Mortality in Chinese Patients Undergoing Heart Valve Surgery. *Heart Lung Circ.* 2013;22:612-617.
35. Watanabe Y, Hayashida K, Lefevre T, Chevalier B, Hovasse T, Romano M, Garot P, Farge A, Donzeau-Gouge P, Bouvier E, Cormier B, Morice MC. Is Euroscore II Better Than Euroscore in Predicting Mortality after Transcatheter Aortic Valve Implantation? *Catheter Cardiovasc Interv.* 2013;81:1053-1060.
36. Wang TK, Choi DH, Ramanathan T, Ruygrok PN. Comparing Performance of Risk Scores for Combined Aortic Valve Replacement and Coronary Bypass Grafting Surgery. *Heart Lung Circ.* 2016;25:1118-1123.
37. Wang TK, Harnos S, Gamble GD, Ramanathan T, Ruygrok PN. Performance of Contemporary Surgical Risk Scores for Mitral Valve Surgery. *J Card Surg.* 2017;32:172-176.
38. Piazza N, Wenaweser P, van Gameren M, Pilgrim T, Tzikas A, Otten A, Nuis R, Onuma Y, Cheng JM, Kappetein AP, Boersma E, Juni P, de Jaegere P, Windecker S, Serruys PW. Relationship between the Logistic Euroscore and the Society of Thoracic Surgeons Predicted Risk of Mortality Score in Patients Implanted with the Corevalve Revalving System--a Bern-Rotterdam Study. *Am Heart J.* 2010;159:323-329.
39. Basraon J, Chandrashekhara YS, John R, Agnihotri A, Kelly R, Ward H, Adabag S. Comparison of Risk Scores to Estimate Perioperative Mortality in Aortic Valve Replacement Surgery. *Ann Thorac Surg.* 2011;92:535-540.
40. Zhang CX, Xu JP, Ge YP, Wei Y, Yang Y, Liu F, Shi Y. Validation of Four Different Risk Stratification Models in Patients Undergoing Heart Valve Surgery in a Single Center in China. *Chin Med J (Engl).* 2011;124:2254-2259.



41. Durand E, Borz B, Godin M, Tron C, Litzler PY, Bessou JP, Dacher JN, Bauer F, Cribier A, Eltchaninoff H. Performance Analysis of Euroscore Ii Compared to the Original Logistic Euroscore and Sts Scores for Predicting 30-Day Mortality after Transcatheter Aortic Valve Replacement. *Am J Cardiol.* 2013;111:891-897.
42. Haensig M, Holzhey DM, Borger MA, Schuler G, Shi W, Subramanian S, Rastan AJ, Mohr FW. Is the New Euroscore Ii a Better Predictor for Transapical Aortic Valve Implantation? *Eur J Cardiothorac Surg.* 2013;44:302-308; discussion 308.
43. Laurent M, Fournet M, Feit B, Oger E, Donal E, Thebault C, Biron Y, Beneux X, Sellin M, Le Reveille S, Flecher E, Leguerrier A. Simple Bedside Clinical Evaluation Versus Established Scores in the Estimation of Operative Risk in Valve Replacement for Severe Aortic Stenosis. *Arch Cardiovasc Dis.* 2013;106:651-660.
44. Barili F, Pacini D, Grossi C, Di Bartolomeo R, Alamanni F, Parolari A. Reliability of New Scores in Predicting Perioperative Mortality after Mitral Valve Surgery. *J Thorac Cardiovasc Surg.* 2014;147:1008-1012.
45. Beohar N, Whisenant B, Kirtane AJ, Leon MB, Tuzcu EM, Makkar R, Svensson LG, Miller DC, Smith CR, Pichard AD, Herrmann HC, Thourani VH, Szeto WY, Lim S, Fischbein M, Fearon WF, O'Neill W, Xu K, Dewey T, Mack M. The Relative Performance Characteristics of the Logistic European System for Cardiac Operative Risk Evaluation Score and the Society of Thoracic Surgeons Score in the Placement of Aortic Transcatheter Valves Trial. *J Thorac Cardiovasc Surg.* 2014;148:2830-2837.e2831.
46. Chan V, Ahrari A, Ruel M, Elmistekawy E, Hynes M, Mesana TG. Perioperative Deaths after Mitral Valve Operations May Be Overestimated by Contemporary Risk Models. *Ann Thorac Surg.* 2014;98:605-610; discussion 610.
47. Osnabrugge RL, Speir AM, Head SJ, Fonner CE, Fonner E, Kappetein AP, Rich JB. Performance of Euroscore Ii in a Large Us Database: Implications for Transcatheter Aortic Valve Implantation. *Eur J Cardiothorac Surg.* 2014;46:400-408; discussion 408.
48. Rabbani MS, Qadir I, Ahmed Y, Gul M, Sharif H. Heart Valve Surgery: Euroscore Vs. Euroscore Ii Vs. Society of Thoracic Surgeons Score. *Heart Int.* 2014;9:53-58.
49. Wendt D, Thielmann M, Kahlert P, Kastner S, Price V, Al-Rashid F, Patsalis P, Erbel R, Jakob H. Comparison between Different Risk Scoring Algorithms on Isolated Conventional or Transcatheter Aortic Valve Replacement. *Ann Thorac Surg.* 2014;97:796-802.
50. Wang L, Lu FL, Wang C, Tan MW, Xu ZY. Society of Thoracic Surgeons 2008 Cardiac Risk Models Predict in-Hospital Mortality of Heart Valve Surgery in a Chinese Population: A Multicenter Study. *J Thorac Cardiovasc Surg.* 2014;148:3036-3041.
51. Adamo M, Capodanno D, Cannata S, Giannini C, Laudisa ML, Barbanti M, Curello S, Imme S, Maffeo D, Grasso C, Bedogni F, Petronio AS, Etti F, Tamburino C, GRASP-IT Investigators. Comparison of Three Contemporary Surgical Scores for Predicting All-Cause Mortality of Patients Undergoing Percutaneous Mitral Valve Repair with the Mitraclip System (from the Multicenter Grasp-It Registry). *Am J Cardiol.* 2015;115:107-112.
52. Holinski S, Jessen S, Neumann K, Konertz W. Predictive Power and Implication of Euroscore, Euroscore Ii and Sts Score for Isolated Repeated Aortic Valve Replacement. *Ann Thorac Cardiovasc Surg.* 2015;21:242-246.
53. Silaschi M, Conradi L, Seiffert M, Schnabel R, Schon G, Blankenberg S, Reichenspurner H, Diemert P, Treede H. Predicting Risk in Transcatheter Aortic Valve Implantation: Comparative Analysis of Euroscore Ii and Established Risk Stratification Tools. *Thorac Cardiovasc Surg.* 2015;63:472-478.

54. Silva LS, Caramori PR, Nunes Filho AC, Katz M, Guaragna JC, Lemos P, Lima V, Abizaid A, Tarasoutchi F, Brito FS, Jr. Performance of Surgical Risk Scores to Predict Mortality after Transcatheter Aortic Valve Implantation. *Arq Bras Cardiol.* 2015;105:241-247.
55. Sinning JM, Wollert KC, Sedaghat A, Widera C, Radermacher MC, Descoups C, Hammerstingl C, Weber M, Stundl A, Ghanem A, Widder J, Vasa-Nicotera M, Mellert F, Schiller W, Bauersachs J, Zur B, Holdenrieder S, Welz A, Grube E, Pencina MJ, Nickenig G, Werner N, Kempf T. Risk Scores and Biomarkers for the Prediction of 1-Year Outcome after Transcatheter Aortic Valve Replacement. *Am Heart J.* 2015;170:821-829.
56. Tralhao A, Teles RC, Almeida MS, Madeira S, Santos MB, Andrade MJ, Mendes M, Neves JP. Aortic Valve Replacement for Severe Aortic Stenosis in Octogenarians: Patient Outcomes and Comparison of Operative Risk Scores. *Rev Port Cardiol.* 2015;34:439-446.
57. Vassileva CM, Aranki S, Brennan JM, Kaneko T, He M, Gammie JS, Suri RM, Thourani VH, Hazelrigg S, McCarthy P. Evaluation of the Society of Thoracic Surgeons Online Risk Calculator for Assessment of Risk in Patients Presenting for Aortic Valve Replacement after Prior Coronary Artery Bypass Graft: An Analysis Using the Sts Adult Cardiac Surgery Database. *Ann Thorac Surg.* 2015;100:2109-2115; discussion 2115-2106.
58. Wang TK, Choi DH, Stewart R, Gamble G, Haydock D, Ruygrok P. Comparison of Four Contemporary Risk Models at Predicting Mortality after Aortic Valve Replacement. *J Thorac Cardiovasc Surg.* 2015;149:443-448.
59. Wang TK, Choi DH, Haydock D, Gamble G, Stewart R, Ruygrok P. Comparison of Risk Scores for Prediction of Complications Following Aortic Valve Replacement. *Heart Lung Circ.* 2015;24:595-601.
60. Barili F, Pacini D, D'Ovidio M, Ventura M, Alamanni F, Di Bartolomeo R, Grossi C, Davoli M, Fusco D, Perucci C, Parolari A. Reliability of Modern Scores to Predict Long-Term Mortality after Isolated Aortic Valve Operations. *Ann Thorac Surg.* 2016;101:599-605.
61. Collas VM, Van De Heyning CM, Paelinck BP, Rodrigus IE, Vrints CJ, Bosmans JM. Validation of Transcatheter Aortic Valve Implantation Risk Scores in Relation to Early and Mid-Term Survival: A Single-Centre Study. *Interact Cardiovasc Thorac Surg.* 2016;22:273-279.
62. Halkin A, Steinvil A, Witberg G, Barsheshet A, Barkagan M, Assali A, Segev A, Fefer P, Guetta V, Barbash IM, Kornowski R, Finkelstein A. Mortality Prediction Following Transcatheter Aortic Valve Replacement: A Quantitative Comparison of Risk Scores Derived from Populations Treated with Either Surgical or Percutaneous Aortic Valve Replacement. The Israeli Tavr Registry Risk Model Accuracy Assessment (Irrma) Study. *Int J Cardiol.* 2016;215:227-231.
63. Kortlandt FA, van 't Klooster CC, Bakker AL, Swaans MJ, Kelder JC, de Kroon TL, Rensing BJ, Eefting FD, van der Heyden JA, Post MC. The Predictive Value of Conventional Surgical Risk Scores for Periprocedural Mortality in Percutaneous Mitral Valve Repair. *Neth Heart J.* 2016;24:475-480.
64. Peguero JG, Lo Presti S, Issa O, Podesta C, Parise H, Layka A, Brenes JC, Lamelas J, Lamas GA. Simplified Prediction of Postoperative Cardiac Surgery Outcomes with a Novel Score: R2chads2. *Am Heart J.* 2016;177:153-159.
65. Rosa VE, Lopes AS, Accorsi TA, Fernandes JR, Spina GS, Sampaio RO, Paixao MR, Pomerantzeff PM, Lemos Neto PA, Tarasoutchi F. Euroscore II and Sts as Mortality Predictors in Patients Undergoing TAVI. *Rev Assoc Med Bras (1992).* 2016;62:32-37.
66. Wang C, Tang YF, Zhang JJ, Bai YF, Yu YC, Zhang GX, Han L. Comparison of Four Risk Scores for in-Hospital Mortality in Patients Undergoing Heart Valve Surgery: A Multicenter Study in a Chinese Population. *Heart Lung.* 2016;45:423-428.

67. Yamaoka H, Kuwaki K, Inaba H, Yamamoto T, Kato TS, Dohi S, Matsushita S, Amano A. Comparison of Modern Risk Scores in Predicting Operative Mortality for Patients Undergoing Aortic Valve Replacement for Aortic Stenosis. *J Cardiol*. 2016;68:135-140.
68. Zbronski K, Huczek Z, Puchta D, Paczwa K, Kochman J, Wilimski R, Scislo P, Rymuza B, Filipiak KJ, Opolski G. Outcome Prediction Following Transcatheter Aortic Valve Implantation: Multiple Risk Scores Comparison. *Cardiol J*. 2016;23:169-177.
69. Balan P, Zhao Y, Johnson S, Arain S, Dhoble A, Estrera A, Smalling R, Nguyen TC. The Society of Thoracic Surgery Risk Score as a Predictor of 30-Day Mortality in Transcatheter Vs Surgical Aortic Valve Replacement: A Single-Center Experience and Its Implications for the Development of a Tavr Risk-Prediction Model. *J Invasive Cardiol*. 2017;29:109-114.
70. Schmid J, Stojakovic T, Zweiker D, Scharnagl H, Maderthaner RD, Scherr D, Maier R, Schmidt A, Marz W, Binder JS, Rainer PP. St2 Predicts Survival in Patients Undergoing Transcatheter Aortic Valve Implantation. *Int J Cardiol*. 2017;244:87-92.
71. Sa MP, Sa MV, Albuquerque AC, Silva BB, Siqueira JW, Brito PR, Vasconcelos FP, Lima Rde C. Guaragnascore Satisfactorily Predicts Outcomes in Heart Valve Surgery in a Brazilian Hospital. *Rev Bras Cir Cardiovasc*. 2012;27:1-6.
72. Kalender M, Baysal AN, Karaca OG, Boyacioglu K, Kayalar N. Validation of German Aortic Valve Score in a Multi-Surgeon Single Center. *Braz J Cardiovasc Surg*. 2017;32:77-82.
73. Martin GP, Sperrin M, Ludman PF, de Belder MA, Gale CP, Toff WD, Moat NE, Trivedi U, Buchan I, Mamas MA. Inadequacy of Existing Clinical Prediction Models for Predicting Mortality after Transcatheter Aortic Valve Implantation. *Am Heart J*. 2017;184:97-105.
74. Arnold SV, Afilalo J, Spertus JA, Tang Y, Baron SJ, Jones PG, Reardon MJ, Yakubov SJ, Adams DH, Cohen DJ. Prediction of Poor Outcome after Transcatheter Aortic Valve Replacement. *J Am Coll Cardiol*. 2016;68:1868-1877.
75. De Bacco G, De Bacco MW, Sant'Anna JR, Santos MF, Sant'Anna RT, Prates PR, Kalil RA, Nesralla IA. Applicability of Ambler's Risk Score to Patients Who Have Undergone Valve Replacement with Bovine Pericardial Bioprosthesis. *Rev Bras Cir Cardiovasc*. 2008;23:336-343
76. Dewey TM, Brown D, Ryan WH, Herbert MA, Prince SL, Mack MJ. Reliability of Risk Algorithms in Predicting Early and Late Operative Outcomes in High-Risk Patients Undergoing Aortic Valve Replacement. *J Thorac Cardiovasc Surg*. 2008;135:180-187.
77. Tran HA, Roy SK, Hebsur S, Barnett SD, Schlauch KA, Hunt SL, Holmes SD, Ad N. Performance of Four Risk Algorithms in Predicting Intermediate Survival in Patients Undergoing Aortic Valve Replacement. *Innovations (Phila)*. 2010;5:407-412.
78. van Gameren M ea. Do We Need Separate Risk Stratification Models for Hospital Mortality after Heart Valve Surgery? - Pubmed - Ncbi. *Ann Thorac Surg*. 2008;85:921-930.
79. Barili F, Pacini D, Rosato F, Parolari A. The Role of Surgical Procedures on Discriminative Performance of the Updated Euroscore Ii. *J Thorac Cardiovasc Surg*. 2013;146:986-987.
80. Carnero-Alcazar M, Silva Guisasaola JA, Reguillo Lacruz FJ, Maroto Castellanos LC, Cobiella Carnicer J, Villagran Medinilla E, Tejerina Sanchez T, Rodriguez Hernandez JE. Validation of Euroscore Ii on a Single-Centre 3800 Patient Cohort. *Interact Cardiovasc Thorac Surg*. 2013;16:293-300.
81. Chalmers J, Pullan M, Fabri B, McShane J, Shaw M, Mediratta N, Poullis M. Validation of Euroscore Ii in a Modern Cohort of Patients Undergoing Cardiac Surgery. *Eur J Cardiothorac Surg*. 2013;43:688-694.

82. Howell NJ, Head SJ, Freemantle N, van der Meulen TA, Senanayake E, Menon A, Kappetein AP, Pagano D. The New Euroscore Ii Does Not Improve Prediction of Mortality in High-Risk Patients Undergoing Cardiac Surgery: A Collaborative Analysis of Two European Centres. *Eur J Cardiothorac Surg.* 2013;44:1006-1011; discussion 1011.
83. Sedaghat A, Sinning JM, Vasa-Nicotera M, Ghanem A, Hammerstingl C, Grube E, Nickenig G, Werner N. The Revised Euroscore Ii for the Prediction of Mortality in Patients Undergoing Transcatheter Aortic Valve Implantation. *Clin Res Cardiol.* 2013;102:821-829.
84. Zhang GX, Wang C, Wang L, Lu FL, Li BL, Han L, Xu ZY. Validation of Euroscore Ii in Chinese Patients Undergoing Heart Valve Surgery. *Heart Lung Circ.* 2013;22:606-611.
85. Barili F, Pacini D, Rosato F, Roberto M, Battisti A, Grossi C, Alamanni F, Di Bartolomeo R, Parolari A. In-Hospital Mortality Risk Assessment in Elective and Non-Elective Cardiac Surgery: A Comparison between Euroscore Ii and Age, Creatinine, Ejection Fraction Score. *Eur J Cardiothorac Surg.* 2014;46:44-48.
86. Koszta G, Sira G, Szatmari K, Farkas E, Szerafin T, Fulesdi B. Performance of Euroscore Ii in Hungary: A Single-Centre Validation Study. *Heart Lung Circ.* 2014;23:1041-1050.
87. Spiliopoulos K, Bagiatis V, Deutsch O, Kemkes BM, Antonopoulos N, Karangelis D, Haschemi A, Gansera B. Performance of Euroscore Ii Compared to Euroscore I in Predicting Operative and Mid-Term Mortality of Patients from a Single Center after Combined Coronary Artery Bypass Grafting and Aortic Valve Replacement. *Gen Thorac Cardiovasc Surg.* 2014;62:103-111.
88. Wang L, Han QQ, Qiao F, Wang C, Zhang XW, Han L, Xu ZY. Performance of Euroscore Ii in Patients Who Have Undergone Heart Valve Surgery: A Multicentre Study in a Chinese Population. *Eur J Cardiothorac Surg.* 2014;45:359-364.
89. Moscarelli M, Bianchi G, Margaryan R, Cerillo A, Farneti P, Murzi M, Solinas M. Accuracy of Euroscore Ii in Patients Undergoing Minimally Invasive Mitral Valve Surgery. *Interact Cardiovasc Thorac Surg.* 2015;21:748-753.
90. Poullis M, Pullan M, Chalmers J, Mediratta N. The Validity of the Original Euroscore and Euroscore Ii in Patients over the Age of Seventy. *Interact Cardiovasc Thorac Surg.* 2015;20:172-177.
91. Patrat-Delon S, Rouxel A, Gacouin A, Revest M, Flecher E, Fouquet O, Le Tulzo Y, Lerolle N, Tattevin P, Tadie JM. Euroscore Ii Underestimates Mortality after Cardiac Surgery for Infective Endocarditis. *Eur J Cardiothorac Surg.* 2016;49:944-951.
92. Allyn J, Allou N, Augustin P, Philip I, Martinet O, Belghiti M, Provenchere S, Montravers P, Ferdynus C. A Comparison of a Machine Learning Model with Euroscore Ii in Predicting Mortality after Elective Cardiac Surgery: A Decision Curve Analysis. *PLoS One.* 2017;12:e0169772.
93. Bomberg H, Klingele M, Wagenpfeil S, Spanuth E, Volk T, Sessler DI, Schafers HJ, Groesdonk HV. Presepsin (Scd14-St) Is a Novel Marker for Risk Stratification in Cardiac Surgery Patients. *Anesthesiology.* 2017;126:631-642.
94. Kar P, Geeta K, Gopinath R, Durga P. Mortality Prediction in Indian Cardiac Surgery Patients: Validation of European System for Cardiac Operative Risk Evaluation Ii. *Indian J Anaesth.* 2017;61:157-162.
95. Mateos-Panero B, Sanchez-Casado M, Castano-Moreira B, Paredes-Astillero I, Lopez-Almodovar LF, Bustos-Molina F. Assessment of Euroscore and Saps Iii as Hospital Mortality Predicted in Cardiac Surgery. *Rev Esp Anesthesiol Reanim.* 2017;64:273-281.

96. Jin R, Grunkemeier GL, Providence Health & Services and Swedish Health Services Cardiovascular Disease Study Group. Validation of New York Operative Mortality Risk Score for Valve and Valve/Coronary Artery Bypass Grafting Operations. *Ann Thorac Surg.* 2013;95:1291-1296.
